# Supplementary material for: Non-innocence and mixed valency in tri- and tetranuclear ruthenium complexes of a heteroquinone bridging ligand
Source: Royal Society of Chemistry journal article supplement (doi:10.1039/c7dt03509h), 2017-01-01
Supplement: c7dt03509h1.pdf [file c7dt03509h1.pdf]

## **Electronic Supplementary Information**

### **Non-innocence and mixed valency in tri- and tetranuclear ruthenium complexes of a heteroquinone bridging ligand**

Mohd. Ansari Ansari,<sup>a</sup> Abhishek Mandal,<sup>a</sup> Katharina Beyer,<sup>b</sup> Alexa Paretzki,<sup>b</sup> Brigitte Schwederski,<sup>b</sup> Wolfgang Kaim,<sup>\*b</sup> and Goutam Kumar Lahiri<sup>\*a</sup>

*<sup>a</sup>Department of Chemistry, Indian Institute of Technology Bombay, Powai, Mumbai 400076, India. E-mail: lahiri@chem.iitb.ac.in*

*<sup>b</sup>Institut für Anorganische Chemie, Universität Stuttgart, Pfaffenwaldring 55, D-70550 Stuttgart, Germany. E-mail: kaim@iac.uni-stuttgart.de*

**Table S1** Selected experimental and DFT calculated bond angles (deg) for **1** and **2**

| <b>1 (Molecule A)</b> |          |                    | <b>1 (Molecule B)</b> |          | <b>2•2CH<sub>3</sub>CN</b> |            |                    |
|-----------------------|----------|--------------------|-----------------------|----------|----------------------------|------------|--------------------|
| bond angle            | X-ray    | DFT ( <i>S</i> =0) | bond angle            | X-ray    | bond angle                 | X-ray      | DFT ( <i>S</i> =0) |
| N1-Ru1-O1             | 81.5(5)  | 79.382             | N5-Ru4-O15            | 80.3(5)  | N1-Ru1-O1                  | 81.74(11)  | 79.474             |
| N1-Ru1-O3             | 82.8(5)  | 90.008             | N5-Ru4-O17            | 170.6(5) | N1-Ru1-O2                  | 174.44(11) | 174.173            |
| N1-Ru1-O4             | 100.5(5) | 101.387            | N5-Ru4-O18            | 96.7(5)  | N1-Ru1-O3                  | 87.96(11)  | 85.695             |
| N1-Ru1-O5             | 170.9(5) | 172.164            | N5-Ru4-O19            | 103.9(6) | N1-Ru1-O4                  | 100.56(11) | 101.385            |
| N1-Ru1-O6             | 94.7(5)  | 91.597             | N5-Ru4-O20            | 84.2(5)  | N1-Ru1-O5                  | 90.42(11)  | 94.873             |
| O1-Ru1-O3             | 85.7(5)  | 85.602             | O15-Ru4-O17           | 94.4(5)  | O1-Ru1-O2                  | 92.78(10)  | 95.168             |
| O1-Ru1-O4             | 177.0(4) | 176.795            | O15-Ru4-O18           | 92.1(5)  | O1-Ru1-O3                  | 86.90(10)  | 89.128             |
| O1-Ru1-O5             | 91.8(5)  | 93.064             | O15-Ru4-O19           | 175.7(5) | O1-Ru1-O4                  | 174.39(10) | 177.251            |
| O1-Ru1-O6             | 93.4(5)  | 95.316             | O15-Ru4-O20           | 86.8(6)  | O1-Ru1-O5                  | 93.64(10)  | 92.048             |
| O3-Ru1-O4             | 92.4(5)  | 91.279             | O17-Ru4-O18           | 91.2(5)  | O2-Ru1-O3                  | 92.69(11)  | 91.975             |
| O3-Ru1-O5             | 90.6(5)  | 87.314             | O17-Ru4-O19           | 81.4(5)  | O2-Ru1-O4                  | 84.99(11)  | 83.863             |
| O3-Ru1-O6             | 177.4(5) | 178.274            | O17-Ru4-O20           | 87.8(5)  | O2-Ru1-O5                  | 88.99(11)  | 87.561             |
| O4-Ru1-O5             | 86.0(5)  | 86.043             | O18-Ru4-O19           | 87.2(5)  | O3-Ru1-O4                  | 88.06(11)  | 88.336             |
| O4-Ru1-O6             | 88.6(5)  | 87.783             | O18-Ru4-O20           | 178.5(6) | O3-Ru1-O5                  | 178.21(11) | 178.770            |
| O5-Ru1-O6             | 91.8(5)  | 91.175             | O19-Ru4-O20           | 93.7(6)  | O4-Ru1-O5                  | 91.47(11)  | 90.482             |
| N2-Ru2-O2             | 82.7(6)  | 79.343             | N6-Ru5-O16            | 81.3(5)  | N2-Ru2-O1'                 | 81.76(11)  | 79.401             |
| N2-Ru2-O7             | 93.5(5)  | 95.199             | N6-Ru5-O25            | 95.1(5)  | N2-Ru2-O6                  | 175.22(11) | 173.969            |
| N2-Ru2-O8             | 99.3(6)  | 100.250            | N6-Ru5-O26            | 99.8(6)  | N2-Ru2-O7                  | 87.33(11)  | 85.570             |
| N2-Ru2-O9             | 173.5(6) | 85.022             | N6-Ru5-O27            | 172.7(6) | N2-Ru2-O8                  | 98.22(11)  | 101.344            |
| N2-Ru2-O10            | 85.4(5)  | 174.369            | N6-Ru5-O28            | 85.0(6)  | N2-Ru2-O9                  | 92.14(11)  | 95.060             |
| O2-Ru2-O7             | 92.7(5)  | 93.113             | O16-Ru5-O25           | 93.0(5)  | O1'-Ru2-O6                 | 93.49(10)  | 95.091             |
| O2-Ru2-8              | 174.2(5) | 176.097            | O16-Ru5-O26           | 173.9(5) | O1'-Ru2-O7                 | 86.17(10)  | 89.414             |
| O2-Ru2-O9             | 90.9(5)  | 87.995             | O16-Ru5-O27           | 91.4(5)  | O1'-Ru2-O8                 | 174.09(9)  | 177.274            |
| O2-Ru2-O10            | 88.7(6)  | 95.823             | O16-Ru5-O28           | 88.3(5)  | O1'-Ru2-O9                 | 93.60(10)  | 92.027             |
| O7-Ru2-O8             | 92.6(6)  | 90.789             | O25-Ru5-O26           | 92.8(5)  | O6-Ru2-O7                  | 92.93(10)  | 91.960             |
| O7-Ru2-O9             | 88.2(6)  | 178.891            | O25-Ru5-O27           | 85.7(5)  | O6-Ru2-O8                  | 86.57(10)  | 84.045             |

|             |          |         |             |          |           |            |         |
|-------------|----------|---------|-------------|----------|-----------|------------|---------|
| O7-Ru2-O10  | 178.1(6) | 87.905  | O25-Ru5-O28 | 178.6(6) | O6-Ru2-O9 | 87.58(10)  | 87.542  |
| O8-Ru2-O9   | 86.9(6)  | 88.103  | O26-Ru5-O27 | 87.4(6)  | O7-Ru2-O8 | 87.93(10)  | 88.034  |
| O8-Ru2-O10  | 86.1(6)  | 84.374  | O26-Ru5-O28 | 85.8(5)  | O7-Ru2-O9 | 179.45(11) | 178.512 |
| O9-Ru2-O10  | 93.1(6)  | 91.964  | O27-Ru5-O28 | 94.3(6)  | O8-Ru2-O9 | 92.31(10)  | 90.519  |
| N3-Ru3-O2   | 81.8(6)  | 79.280  | N7-Ru6-O16  | 81.4(5)  | -         | -          | -       |
| N3-Ru3-O11  | 85.8(5)  | 86.643  | N7-Ru6-O21  | 85.1(6)  | -         | -          | -       |
| N3-Ru3-O12  | 175.0(6) | 173.953 | N7-Ru6-O22  | 174.8(6) | -         | -          | -       |
| N3-Ru3-O13  | 98.4(6)  | 93.670  | N7-Ru6-O23  | 101.8(5) | -         | -          | -       |
| N3-Ru3-O14  | 95.1(5)  | 102.212 | N7-Ru6-O24  | 94.1(5)  | -         | -          | -       |
| O2-Ru3-O11  | 86.2(5)  | 90.362  | O16-Ru6-O21 | 87.3(5)  | -         | -          | -       |
| O2-Ru3-O12  | 93.2(5)  | 94.862  | O16-Ru6-O22 | 93.5(5)  | -         | -          | -       |
| O2-Ru3-O13  | 171.4(5) | 91.025  | O16-Ru6-O23 | 173.0(5) | -         | -          | -       |
| O2-Ru3-O14  | 96.0(5)  | 177.957 | O16-Ru6-O24 | 94.1(5)  | -         | -          | -       |
| O11-Ru3-O12 | 94.3(6)  | 91.934  | O21-Ru6-O22 | 94.4(6)  | -         | -          | -       |
| O11-Ru3-O13 | 85.2(5)  | 178.612 | O21-Ru6-O23 | 86.7(5)  | -         | -          | -       |
| O11-Ru3-O14 | 177.7(5) | 88.341  | O21-Ru6-O24 | 178.3(6) | -         | -          | -       |
| O12-Ru3-O13 | 86.6(5)  | 87.892  | O22-Ru6-O23 | 83.3(5)  | -         | -          | -       |
| O12-Ru3-O14 | 84.9(6)  | 83.608  | O22-Ru6-O24 | 86.4(5)  | -         | -          | -       |
| O13-Ru3-O14 | 92.5(5)  | 90.271  | O23-Ru6-O24 | 91.9(5)  | -         | -          | -       |

**Table S2** Selected DFT calculated bond lengths (Å) for **1<sup>n</sup>** (Molecule A)

| Bond length | DFT                                     |                                          |                            |                            |                                          |                                         |                                           |
|-------------|-----------------------------------------|------------------------------------------|----------------------------|----------------------------|------------------------------------------|-----------------------------------------|-------------------------------------------|
|             | <b>1<sup>2+</sup></b><br>( <i>S</i> =1) | <b>1<sup>+</sup></b><br>( <i>S</i> =1/2) | <b>1</b><br>( <i>S</i> =0) | <b>1</b><br>( <i>S</i> =1) | <b>1<sup>-</sup></b><br>( <i>S</i> =1/2) | <b>1<sup>2-</sup></b><br>( <i>S</i> =1) | <b>1<sup>3-</sup></b><br>( <i>S</i> =1/2) |
| Ru1-O1      | 2.076                                   | 2.030                                    | 2.054                      | 1.999                      | 2.060                                    | 2.058                                   | 2.072                                     |
| Ru1-N1      | 2.153                                   | 2.147                                    | 2.057                      | 2.136                      | 2.077                                    | 2.109                                   | 2.120                                     |
| Ru1-O3      | 2.027                                   | 2.041                                    | 2.060                      | 2.066                      | 2.071                                    | 2.101                                   | 2.131                                     |
| Ru1-O4      | 2.021                                   | 2.047                                    | 2.064                      | 2.076                      | 2.087                                    | 2.085                                   | 2.087                                     |
| Ru1-O5      | 2.010                                   | 2.036                                    | 2.069                      | 2.063                      | 2.082                                    | 2.117                                   | 2.090                                     |
| Ru1-O6      | 2.018                                   | 2.023                                    | 2.067                      | 2.040                      | 2.077                                    | 2.084                                   | 2.120                                     |
| Ru2-O2      | 2.166                                   | 2.091                                    | 2.113                      | 2.156                      | 2.119                                    | 2.136                                   | 2.158                                     |
| Ru2-N2      | 2.163                                   | 2.157                                    | 2.095                      | 2.076                      | 2.108                                    | 2.124                                   | 2.125                                     |
| Ru2-O7      | 2.027                                   | 2.047                                    | 2.079                      | 2.059                      | 2.083                                    | 2.087                                   | 2.086                                     |
| Ru2-O8      | 2.013                                   | 2.029                                    | 2.053                      | 2.072                      | 2.084                                    | 2.096                                   | 2.104                                     |
| Ru2-O9      | 2.017                                   | 2.025                                    | 2.055                      | 2.067                      | 2.070                                    | 2.078                                   | 2.086                                     |
| Ru2-O10     | 2.017                                   | 2.046                                    | 2.058                      | 2.077                      | 2.078                                    | 2.096                                   | 2.118                                     |
| Ru3-O2      | 2.055                                   | 2.080                                    | 2.095                      | 2.065                      | 2.112                                    | 2.130                                   | 2.146                                     |
| Ru3-N3      | 2.138                                   | 2.162                                    | 2.114                      | 2.148                      | 2.114                                    | 2.125                                   | 2.131                                     |
| Ru3-O11     | 2.02                                    | 2.026                                    | 2.053                      | 2.029                      | 2.070                                    | 2.080                                   | 2.088                                     |
| Ru3-O12     | 2.043                                   | 2.053                                    | 2.061                      | 2.058                      | 2.080                                    | 2.097                                   | 2.120                                     |
| Ru3-O13     | 2.061                                   | 2.053                                    | 2.078                      | 2.049                      | 2.083                                    | 2.086                                   | 2.084                                     |
| Ru3-O14     | 2.013                                   | 2.029                                    | 2.065                      | 2.048                      | 2.091                                    | 2.103                                   | 2.111                                     |
| C1-O1       | 1.257                                   | 1.282                                    | 1.266                      | 1.290                      | 1.272                                    | 1.296                                   | 1.295                                     |
| C1-C2       | 1.457                                   | 1.435                                    | 1.442                      | 1.431                      | 1.441                                    | 1.425                                   | 1.437                                     |
| C2-N1       | 1.340                                   | 1.347                                    | 1.349                      | 1.346                      | 1.349                                    | 1.358                                   | 1.376                                     |
| C2-C9       | 1.426                                   | 1.435                                    | 1.417                      | 1.432                      | 1.426                                    | 1.432                                   | 1.409                                     |
| N1-C3       | 1.367                                   | 1.357                                    | 1.383                      | 1.372                      | 1.376                                    | 1.377                                   | 1.377                                     |
| C3-C4       | 1.416                                   | 1.423                                    | 1.412                      | 1.415                      | 1.416                                    | 1.413                                   | 1.412                                     |
| C3-C8       | 1.451                                   | 1.456                                    | 1.440                      | 1.443                      | 1.443                                    | 1.439                                   | 1.448                                     |
| C4-C5       | 1.376                                   | 1.371                                    | 1.382                      | 1.379                      | 1.379                                    | 1.385                                   | 1.393                                     |

|         |       |         |       |       |         |         |         |
|---------|-------|---------|-------|-------|---------|---------|---------|
| C5-C6   | 1.416 | 1.42179 | 1.409 | 1.411 | 1.414   | 1.40574 | 1.39959 |
| C6-C7   | 1.378 | 1.37216 | 1.382 | 1.381 | 1.378   | 1.38617 | 1.39355 |
| C7-C8   | 1.415 | 1.42314 | 1.411 | 1.414 | 1.418   | 1.41011 | 1.41092 |
| C8-N2   | 1.367 | 1.35243 | 1.381 | 1.380 | 1.368   | 1.38328 | 1.37880 |
| N2-C9   | 1.349 | 1.36313 | 1.346 | 1.369 | 1.361   | 1.34987 | 1.37531 |
| C9-C10  | 1.424 | 1.39818 | 1.424 | 1.401 | 1.410   | 1.42056 | 1.42591 |
| C10-O2  | 1.314 | 1.35184 | 1.304 | 1.340 | 1.328   | 1.32236 | 1.31976 |
| C10-C11 | 1.423 | 1.40565 | 1.424 | 1.410 | 1.412   | 1.41687 | 1.42621 |
| C11-N3  | 1.350 | 1.36108 | 1.352 | 1.357 | 1.365   | 1.35704 | 1.37980 |
| C11-C18 | 1.433 | 1.44667 | 1.439 | 1.449 | 1.446   | 1.45245 | 1.42505 |
| N3-C12  | 1.365 | 1.35415 | 1.374 | 1.363 | 1.365   | 1.37657 | 1.37942 |
| C12-C13 | 1.414 | 1.42226 | 1.415 | 1.419 | 1.420   | 1.41396 | 1.40981 |
| C12-C17 | 1.450 | 1.45256 | 1.440 | 1.444 | 1.442   | 1.43754 | 1.44880 |
| C13-C14 | 1.380 | 1.37382 | 1.379 | 1.378 | 1.37737 | 1.38473 | 1.39824 |
| C14-C15 | 1.419 | 1.42497 | 1.416 | 1.419 | 1.41881 | 1.41132 | 1.40062 |
| C15-C16 | 1.375 | 1.36922 | 1.377 | 1.374 | 1.37484 | 1.38173 | 1.39306 |
| C16-C17 | 1.420 | 1.42716 | 1.418 | 1.422 | 1.42160 | 1.41835 | 1.41910 |
| C17-N4  | 1.349 | 1.34011 | 1.358 | 1.352 | 1.35376 | 1.36003 | 1.35843 |
| N4-C18  | 1.321 | 1.32968 | 1.318 | 1.325 | 1.32286 | 1.32937 | 1.35812 |
| C18-C1  | 1.464 | 1.44650 | 1.471 | 1.448 | 1.46238 | 1.45095 | 1.45193 |

**Table S3** Selected DFT calculated bond angles (deg) for **1<sup>n</sup>** (Molecule A)

| Bond angle | DFT                                     |                                          |                            |                            |                                          |                                         |                                           |
|------------|-----------------------------------------|------------------------------------------|----------------------------|----------------------------|------------------------------------------|-----------------------------------------|-------------------------------------------|
|            | <b>1<sup>2+</sup></b><br>( <i>S</i> =1) | <b>1<sup>+</sup></b><br>( <i>S</i> =1/2) | <b>1</b><br>( <i>S</i> =0) | <b>1</b><br>( <i>S</i> =1) | <b>1<sup>-</sup></b><br>( <i>S</i> =1/2) | <b>1<sup>2-</sup></b><br>( <i>S</i> =1) | <b>1<sup>3-</sup></b><br>( <i>S</i> =1/2) |
| N1-Ru1-O1  | 77.882                                  | 79.334                                   | 79.382                     | 79.330                     | 79.196                                   | 79.447                                  | 79.144                                    |
| N1-Ru1-O3  | 91.779                                  | 92.324                                   | 90.008                     | 93.030                     | 90.040                                   | 90.437                                  | 90.600                                    |
| N1-Ru1-O4  | 102.618                                 | 102.572                                  | 101.387                    | 103.686                    | 102.339                                  | 103.159                                 | 104.017                                   |
| N1-Ru1-O5  | 170.282                                 | 170.970                                  | 172.164                    | 171.002                    | 171.995                                  | 171.984                                 | 171.841                                   |
| N1-Ru1-O6  | 88.697                                  | 87.336                                   | 91.597                     | 87.455                     | 91.372                                   | 90.601                                  | 90.570                                    |
| O1-Ru1-O3  | 87.187                                  | 88.513                                   | 85.602                     | 90.339                     | 86.540                                   | 88.389                                  | 88.729                                    |
| O1-Ru1-O4  | 176.506                                 | 176.590                                  | 176.795                    | 176.878                    | 177.258                                  | 177.272                                 | 176.773                                   |
| O1-Ru1-O5  | 92.454                                  | 91.685                                   | 93.064                     | 91.676                     | 93.072                                   | 92.723                                  | 92.838                                    |
| O1-Ru1-O6  | 93.106                                  | 92.850                                   | 95.316                     | 92.214                     | 93.899                                   | 91.824                                  | 91.398                                    |
| O3-Ru1-O4  | 89.340                                  | 88.582                                   | 91.279                     | 88.700                     | 91.174                                   | 90.774                                  | 90.576                                    |
| O3-Ru1-O5  | 88.723                                  | 88.349                                   | 87.314                     | 87.241                     | 87.404                                   | 87.608                                  | 87.686                                    |
| O3-Ru1-O6  | 179.485                                 | 178.508                                  | 178.274                    | 177.447                    | 178.577                                  | 178.961                                 | 178.826                                   |
| O4-Ru1-O5  | 87.091                                  | 86.445                                   | 86.043                     | 85.311                     | 85.305                                   | 84.647                                  | 83.984                                    |
| O4-Ru1-O6  | 90.365                                  | 90.073                                   | 87.783                     | 88.750                     | 88.350                                   | 88.967                                  | 89.233                                    |
| O5-Ru1-O6  | 90.841                                  | 92.214                                   | 91.175                     | 92.672                     | 91.220                                   | 91.366                                  | 91.142                                    |
| N2-Ru2-O2  | 78.699                                  | 80.000                                   | 79.343                     | 79.949                     | 79.637                                   | 78.784                                  | 79.070                                    |
| N2-Ru2-O7  | 92.695                                  | 93.737                                   | 95.199                     | 94.839                     | 95.162                                   | 95.143                                  | 94.809                                    |
| N2-Ru2-O8  | 101.302                                 | 100.586                                  | 100.250                    | 101.694                    | 101.653                                  | 102.608                                 | 103.080                                   |
| N2-Ru2-O9  | 86.467                                  | 84.932                                   | 85.022                     | 86.384                     | 85.368                                   | 85.488                                  | 85.967                                    |
| N2-Ru2-O10 | 172.597                                 | 174.073                                  | 174.369                    | 174.426                    | 174.150                                  | 173.811                                 | 173.819                                   |
| O2-Ru2-O7  | 90.057                                  | 90.430                                   | 93.113                     | 85.917                     | 90.644                                   | 90.360                                  | 88.763                                    |
| O2-Ru2-O8  | 179.941                                 | 179.250                                  | 176.097                    | 177.316                    | 177.937                                  | 177.956                                 | 177.846                                   |
| O2-Ru2-O9  | 89.302                                  | 90.906                                   | 87.995                     | 92.778                     | 90.049                                   | 89.906                                  | 90.955                                    |
| O2-Ru2-O10 | 94.434                                  | 94.768                                   | 95.823                     | 95.755                     | 95.356                                   | 95.836                                  | 95.478                                    |
| O7-Ru2-O8  | 89.884                                  | 89.065                                   | 90.789                     | 91.814                     | 90.840                                   | 91.001                                  | 90.928                                    |

|             |         |         |         |         |         |         |         |
|-------------|---------|---------|---------|---------|---------|---------|---------|
| O7-Ru2-O9   | 179.032 | 177.924 | 178.891 | 178.026 | 179.195 | 179.352 | 179.108 |
| O7-Ru2-O10  | 90.049  | 89.058  | 87.905  | 88.357  | 87.875  | 87.895  | 87.933  |
| O8-Ru2-O9   | 90.757  | 89.614  | 88.103  | 89.453  | 87.875  | 88.717  | 89.323  |
| O8-Ru2-O10  | 85.568  | 84.670  | 84.374  | 82.734  | 83.267  | 82.692  | 82.380  |
| O9-Ru2-O10  | 90.724  | 92.414  | 91.964  | 90.302  | 91.651  | 91.490  | 91.252  |
| N3-Ru3-O2   | 79.080  | 79.769  | 79.280  | 79.811  | 79.690  | 78.953  | 79.384  |
| N3-Ru3-O11  | 84.340  | 84.814  | 86.643  | 83.529  | 86.200  | 86.545  | 86.491  |
| N3-Ru3-O12  | 174.197 | 174.381 | 173.953 | 173.066 | 174.133 | 173.956 | 174.003 |
| N3-Ru3-O13  | 95.385  | 93.764  | 93.670  | 95.541  | 94.064  | 93.733  | 93.934  |
| N3-Ru3-O14  | 100.064 | 100.722 | 102.212 | 101.089 | 102.370 | 103.123 | 103.085 |
| O2-Ru3-O11  | 89.462  | 91.291  | 90.362  | 92.421  | 91.337  | 91.070  | 91.293  |
| O2-Ru3-O12  | 95.838  | 95.278  | 94.862  | 94.816  | 94.914  | 95.382  | 95.124  |
| O2-Ru3-O13  | 94.175  | 90.396  | 91.025  | 88.363  | 89.019  | 88.850  | 88.140  |
| O2-Ru3-O14  | 177.044 | 179.240 | 177.957 | 177.435 | 177.931 | 177.916 | 177.400 |
| O11-Ru3-O12 | 92.868  | 92.693  | 91.934  | 92.381  | 91.659  | 91.494  | 91.260  |
| O11-Ru3-O13 | 176.236 | 177.568 | 178.612 | 178.657 | 179.590 | 179.691 | 179.217 |
| O11-Ru3-O14 | 87.635  | 89.332  | 88.341  | 90.070  | 88.999  | 89.242  | 89.684  |
| O12-Ru3-O13 | 87.733  | 88.896  | 87.892  | 88.640  | 88.108  | 88.216  | 88.254  |
| O12-Ru3-O14 | 84.870  | 84.257  | 83.608  | 84.466  | 83.035  | 82.551  | 82.444  |
| O13-Ru3-O14 | 88.719  | 88.994  | 90.271  | 89.158  | 90.637  | 90.826  | 90.861  |

**Table S4** Selected DFT calculated bond lengths (Å) for **2<sup>n</sup>**

| Bond length         | DFT                            |                                 |                   |                   |                                 |                                |                                  |
|---------------------|--------------------------------|---------------------------------|-------------------|-------------------|---------------------------------|--------------------------------|----------------------------------|
|                     | <b>2<sup>2+</sup></b><br>(S=1) | <b>2<sup>+</sup></b><br>(S=1/2) | <b>2</b><br>(S=0) | <b>2</b><br>(S=1) | <b>2<sup>-</sup></b><br>(S=1/2) | <b>2<sup>2-</sup></b><br>(S=1) | <b>2<sup>3-</sup></b><br>(S=1/2) |
| Ru1-O1              | 2.118                          | 2.097                           | 2.106             | 2.076             | 2.117                           | 2.129                          | 2.139                            |
| Ru1-O2              | 2.033                          | 2.046                           | 2.059             | 2.051             | 2.075                           | 2.093                          | 2.109                            |
| Ru1-O3              | 2.020                          | 2.024                           | 2.054             | 2.026             | 2.067                           | 2.076                          | 2.084                            |
| Ru1-O4              | 2.017                          | 2.026                           | 2.060             | 2.047             | 2.083                           | 2.097                          | 2.122                            |
| Ru1-O5              | 2.036                          | 2.044                           | 2.078             | 2.043             | 2.082                           | 2.086                          | 2.086                            |
| Ru1-N1              | 2.172                          | 2.159                           | 2.110             | 2.148             | 2.115                           | 2.128                          | 2.134                            |
| Ru2-O1 <sup>/</sup> | 2.122                          | 2.082                           | 2.106             | 2.146             | 2.115                           | 2.128                          | 2.139                            |
| Ru2-O6              | 2.031                          | 2.055                           | 2.054             | 2.063             | 2.075                           | 2.092                          | 2.109                            |
| Ru2-O7              | 2.021                          | 2.031                           | 2.059             | 2.072             | 2.067                           | 2.077                          | 2.085                            |
| Ru2-O8              | 2.020                          | 2.033                           | 2.060             | 2.076             | 2.083                           | 2.097                          | 2.122                            |
| Ru2-O9              | 2.033                          | 2.059                           | 2.078             | 2.069             | 2.082                           | 2.086                          | 2.086                            |
| Ru2-N2              | 2.162                          | 2.155                           | 2.110             | 2.087             | 2.116                           | 2.129                          | 2.134                            |
| C1-O1               | 1.331                          | 1.345                           | 1.305             | 1.336             | 1.319                           | 1.323                          | 1.339                            |
| C1-C2               | 1.411                          | 1.406                           | 1.423             | 1.410             | 1.415                           | 1.417                          | 1.407                            |
| C2-N1               | 1.355                          | 1.351                           | 1.346             | 1.353             | 1.355                           | 1.351                          | 1.363                            |
| C2-C9               | 1.439                          | 1.440                           | 1.426             | 1.437             | 1.434                           | 1.438                          | 1.452                            |
| N1-C3               | 1.354                          | 1.364                           | 1.378             | 1.369             | 1.368                           | 1.380                          | 1.368                            |
| C3-C4               | 1.423                          | 1.418                           | 1.413             | 1.417             | 1.419                           | 1.412                          | 1.419                            |
| C3-C8               | 1.459                          | 1.450                           | 1.443             | 1.445             | 1.446                           | 1.439                          | 1.448                            |
| C4-C5               | 1.371                          | 1.375                           | 1.380             | 1.378             | 1.375                           | 1.384                          | 1.381                            |
| C5-C6               | 1.422                          | 1.415                           | 1.410             | 1.411             | 1.415                           | 1.406                          | 1.412                            |
| C6-C7               | 1.371                          | 1.375                           | 1.380             | 1.379             | 1.375                           | 1.384                          | 1.380                            |
| C7-C8               | 1.422                          | 1.418                           | 1.413             | 1.415             | 1.419                           | 1.412                          | 1.419                            |
| C8-N2               | 1.355                          | 1.364                           | 1.378             | 1.379             | 1.368                           | 1.380                          | 1.368                            |
| N2-C9               | 1.358                          | 1.352                           | 1.346             | 1.360             | 1.355                           | 1.351                          | 1.363                            |



**Table S5** Selected DFT calculated bond angles (deg) for **2<sup>n</sup>**

| Bond angle              | DFT                            |                                 |                   |                   |                                 |                                |                                  |
|-------------------------|--------------------------------|---------------------------------|-------------------|-------------------|---------------------------------|--------------------------------|----------------------------------|
|                         | <b>2<sup>2+</sup></b><br>(S=1) | <b>2<sup>+</sup></b><br>(S=1/2) | <b>2</b><br>(S=0) | <b>2</b><br>(S=1) | <b>2<sup>-</sup></b><br>(S=1/2) | <b>2<sup>2-</sup></b><br>(S=1) | <b>2<sup>3-</sup></b><br>(S=1/2) |
| N1-Ru1-O1               | 78.943                         | 79.799                          | 79.474            | 80.125            | 79.524                          | 79.034                         | 79.357                           |
| N1-Ru1-O2               | 173.192                        | 173.833                         | 174.173           | 173.100           | 174.049                         | 174.011                        | 174.017                          |
| N1-Ru1-O3               | 84.998                         | 85.009                          | 85.695            | 85.440            | 85.593                          | 85.784                         | 86.988                           |
| N1-Ru1-O4               | 101.274                        | 100.760                         | 101.385           | 101.495           | 102.241                         | 102.802                        | 103.350                          |
| N1-Ru1-O5               | 93.928                         | 93.633                          | 94.873            | 93.482            | 95.076                          | 94.799                         | 93.738                           |
| O1-Ru1-O2               | 95.027                         | 94.705                          | 95.168            | 93.527            | 95.189                          | 95.584                         | 94.954                           |
| O1-Ru1-O3               | 90.665                         | 90.115                          | 89.128            | 91.487            | 90.156                          | 90.127                         | 90.865                           |
| O1-Ru1-O4               | 179.014                        | 179.429                         | 177.251           | 177.627           | 177.838                         | 177.915                        | 177.278                          |
| O1-Ru1-O5               | 89.681                         | 90.746                          | 92.048            | 88.782            | 90.348                          | 89.945                         | 88.759                           |
| O2-Ru1-O3               | 91.968                         | 92.252                          | 91.975            | 92.071            | 91.732                          | 91.644                         | 91.277                           |
| O2-Ru1-O4               | 84.809                         | 84.731                          | 83.863            | 84.935            | 82.987                          | 82.536                         | 82.350                           |
| O2-Ru1-O5               | 89.160                         | 89.207                          | 87.561            | 89.052            | 87.638                          | 87.772                         | 87.949                           |
| O3-Ru1-O4               | 90.312                         | 89.819                          | 88.336            | 90.375            | 88.742                          | 89.029                         | 89.579                           |
| O3-Ru1-O5               | 178.787                        | 178.241                         | 178.770           | 178.826           | 179.226                         | 179.416                        | 179.107                          |
| O4-Ru1-O5               | 89.345                         | 89.336                          | 90.482            | 89.386            | 90.735                          | 90.880                         | 90.758                           |
| N2-Ru2-O1 <sup>/</sup>  | 79.130                         | 79.621                          | 79.401            | 79.831            | 79.480                          | 79.016                         | 79.344                           |
| N2-Ru2-O6               | 173.064                        | 174.279                         | 173.969           | 174.653           | 173.744                         | 173.614                        | 174.022                          |
| N2-Ru2-O7               | 85.177                         | 85.004                          | 85.570            | 87.105            | 85.500                          | 85.684                         | 86.697                           |
| N2-Ru2-O8               | 101.236                        | 100.930                         | 101.344           | 102.330           | 102.299                         | 102.922                        | 103.375                          |
| N2-Ru2-O9               | 94.126                         | 94.465                          | 95.060            | 94.319            | 95.166                          | 94.833                         | 94.071                           |
| O1 <sup>/</sup> -Ru2-O6 | 94.855                         | 95.191                          | 95.091            | 95.341            | 94.964                          | 90.682                         | 95.083                           |
| O1 <sup>/</sup> -Ru2-O7 | 90.944                         | 90.942                          | 89.414            | 91.710            | 90.596                          | 95.253                         | 91.354                           |
| O1 <sup>/</sup> -Ru2-O8 | 178.641                        | 179.219                         | 177.274           | 177.799           | 177.895                         | 177.920                        | 177.197                          |
| O1 <sup>/</sup> -Ru2-O9 | 89.053                         | 91.214                          | 92.027            | 88.239            | 90.207                          | 89.673                         | 88.167                           |
| O6-Ru2-O7               | 91.519                         | 92.721                          | 91.960            | 90.767            | 91.727                          | 91.615                         | 91.308                           |

|           |         |         |         |         |         |         |         |
|-----------|---------|---------|---------|---------|---------|---------|---------|
| O6-Ru2-O8 | 84.858  | 84.234  | 84.045  | 82.516  | 83.201  | 82.774  | 82.225  |
| O6-Ru2-O9 | 89.188  | 88.016  | 87.542  | 87.788  | 87.679  | 87.897  | 87.866  |
| O7-Ru2-O8 | 90.392  | 88.558  | 88.034  | 88.827  | 88.431  | 88.721  | 89.495  |
| O7-Ru2-O9 | 179.291 | 177.650 | 178.512 | 178.543 | 179.040 | 179.421 | 179.004 |
| O8-Ru2-O9 | 89.614  | 89.296  | 90.519  | 91.170  | 90.749  | 90.909  | 90.943  |

**Table S6** Selected crystallographic parameters of **1** and **2**

|                                                                                       | <b>2 x 1</b>                                                                        | <b>2•2CH<sub>3</sub>CN</b>                                                     |
|---------------------------------------------------------------------------------------|-------------------------------------------------------------------------------------|--------------------------------------------------------------------------------|
| Empirical formula                                                                     | C <sub>102</sub> H <sub>100</sub> N <sub>8</sub> O <sub>32.50</sub> Ru <sub>6</sub> | C <sub>62</sub> H <sub>70</sub> N <sub>6</sub> O <sub>18</sub> Ru <sub>4</sub> |
| Formula weight                                                                        | 2564.31                                                                             | 1591.52                                                                        |
| Crystal system                                                                        | Triclinic                                                                           | Monoclinic                                                                     |
| Space group                                                                           | <i>P</i> 1                                                                          | <i>P</i> 2 <sub>1</sub> / <i>c</i>                                             |
| <i>a</i> / (Å)                                                                        | 11.7442(2)                                                                          | 13.5507(7)                                                                     |
| <i>b</i> / (Å)                                                                        | 14.8795(3)                                                                          | 15.9746(6)                                                                     |
| <i>c</i> / (Å)                                                                        | 17.1035(3)                                                                          | 15.9722(7)                                                                     |
| $\alpha$ / (°)                                                                        | 106.199(2)                                                                          | 90                                                                             |
| $\beta$ / (°)                                                                         | 103.748(2)                                                                          | 110.089(6)                                                                     |
| $\gamma$ / (°)                                                                        | 100.635(2)                                                                          | 90                                                                             |
| <i>V</i> / (Å <sup>3</sup> )                                                          | 2685.20(9)                                                                          | 3247.1(3)                                                                      |
| <i>Z</i>                                                                              | 1                                                                                   | 2                                                                              |
| $\mu$ (mm <sup>-1</sup> )                                                             | 7.355                                                                               | 0.987                                                                          |
| $\rho_{\text{calcd}}$ (g cm <sup>-3</sup> )                                           | 1.585                                                                               | 1.628                                                                          |
| <i>T</i> / K                                                                          | 100.0(3)                                                                            | 150(2)                                                                         |
| <i>F</i> (000)                                                                        | 1292                                                                                | 1608                                                                           |
| $\theta$ range (deg)                                                                  | 2.828 to 75.038                                                                     | 2.555 to 31.215                                                                |
| data/restraints/parameters                                                            | 18456/4/1332                                                                        | 5678/0/415                                                                     |
| <i>R</i> <sub>1</sub> , w <i>R</i> <sub>2</sub> [ <i>I</i> > 2 $\sigma$ ( <i>I</i> )] | 0.0670, 0.1754                                                                      | 0.0379, 0.0905                                                                 |
| <i>R</i> <sub>1</sub> , w <i>R</i> <sub>2</sub> (all data)                            | 0.0703, 0.1790                                                                      | 0.0473, 0.0970                                                                 |
| GOF on <i>F</i> <sup>2</sup>                                                          | 1.034                                                                               | 1.045                                                                          |
| Largest difference in peak / hole (e Å <sup>-3</sup> )                                | 2.038, -1.149                                                                       | 0.63, -0.68                                                                    |

**Table S7** Energies of DFT ((U)B3LYP/LanL2DZ/6-31G\*) calculated optimised structures of **1<sup>n</sup>**

(Molecule A)

| compd                 | $E_{(S=0)}$<br>(Hartrees) | $E_{(S=1/2)}$<br>(Hartrees) | $E_{(S=1)}$<br>(Hartrees) | $E_{(S=3/2)}$<br>(Hartrees) | $\Delta E_{(HE-LE)}^a$                                                  |
|-----------------------|---------------------------|-----------------------------|---------------------------|-----------------------------|-------------------------------------------------------------------------|
| <b>1<sup>2+</sup></b> | -3412.8304                |                             | -3412.8629                |                             | 0.0325 Hartrees<br>85.329 kJ mol <sup>-1</sup><br>7133 cm <sup>-1</sup> |
| <b>1<sup>+</sup></b>  |                           | -3413.1510                  |                           |                             |                                                                         |
| <b>1</b>              | -3413.3319                |                             | -3413.3287                |                             | 0.0032 Hartrees<br>8.402 kJ mol <sup>-1</sup><br>702 cm <sup>-1</sup>   |
| <b>1<sup>-</sup></b>  |                           | -3413.4229                  |                           |                             |                                                                         |
| <b>1<sup>2-</sup></b> | -3413.4023                |                             | -3413.4110                |                             | 0.0087 Hartrees<br>22.842 kJ mol <sup>-1</sup><br>1909 cm <sup>-1</sup> |
| <b>1<sup>3-</sup></b> |                           | -3413.2916                  |                           | -3413.2754                  | 0.0162 Hartrees<br>42.533 kJ mol <sup>-1</sup><br>3555 cm <sup>-1</sup> |

<sup>a</sup>HE = spin state higher in energy, LE = spin state lower in energy

**Table S8** Energies of DFT ((U)B3LYP/LanL2DZ/6-31G\*) calculated optimised structures of **2<sup>n</sup>**

| compd                 | $E_{(S=0)}$<br>(Hartrees) | $E_{(S=1/2)}$<br>(Hartrees) | $E_{(S=1)}$<br>(Hartrees) | $E_{(S=3/2)}$<br>(Hartrees) | $\Delta E_{(HE-LE)}^a$                                                       |
|-----------------------|---------------------------|-----------------------------|---------------------------|-----------------------------|------------------------------------------------------------------------------|
| <b>2<sup>2+</sup></b> | -4197.3251                |                             | -4197.3757                |                             | 0.0506 Hartrees<br>132.850 kJ<br>mol <sup>-1</sup><br>11105 cm <sup>-1</sup> |
| <b>2<sup>+</sup></b>  |                           | -4197.6335                  |                           |                             |                                                                              |
| <b>2</b>              | -4197.8065                |                             | -4197.8058                |                             | 0.0007 Hartrees<br>1.838 kJ mol <sup>-1</sup><br>154 cm <sup>-1</sup>        |
| <b>2<sup>-</sup></b>  |                           | -4197.9003                  |                           |                             |                                                                              |
| <b>2<sup>2-</sup></b> | -4197.8913                |                             | -4197.8980                |                             | 0.0067 Hartrees<br>17.591 kJ mol <sup>-1</sup><br>1470 cm <sup>-1</sup>      |
| <b>2<sup>3-</sup></b> |                           | -4197.7926                  |                           | -4197.7779                  | 0.0147 Hartrees<br>38.595 kJ mol <sup>-1</sup><br>3226 cm <sup>-1</sup>      |

<sup>a</sup>HE = spin state higher in energy, LE = spin state lower in energy

**Table S9** Composition and energy of selected molecular orbitals of **1** ( $S=0$ ) (Molecule A)

| MO     | Energy<br>(eV) | Composition |      |      |      |      |
|--------|----------------|-------------|------|------|------|------|
|        |                | Ru1         | Ru2  | Ru3  | L    | acac |
| HOMO-5 | -5.197         | 0.07        | 0.51 | 0.11 | 0.09 | 0.22 |
| HOMO-4 | -5.132         | 0.36        | 0.01 | 0.24 | 0.17 | 0.22 |
| HOMO-3 | -4.955         | 0.36        | 0.05 | 0.08 | 0.09 | 0.41 |
| HOMO-2 | -4.913         | 0.20        | 0.30 | 0.30 | 0.09 | 0.28 |
| HOMO-1 | -4.752         | 0.02        | 0.36 | 0.25 | 0.05 | 0.32 |
| HOMO   | -4.661         | 0.08        | 0.29 | 0.22 | 0.18 | 0.22 |
| LUMO   | -3.145         | 0.15        | 0.14 | 0.15 | 0.44 | 0.13 |
| LUMO+1 | -2.907         | 0.17        | 0.09 | 0.10 | 0.56 | 0.09 |
| LUMO+2 | -1.913         | 0.02        | 0.02 | 0.03 | 0.89 | 0.03 |
| LUMO+3 | -1.031         | 0.00        | 0.05 | 0.01 | 0.03 | 0.90 |
| LUMO+4 | -0.853         | 0.02        | 0.00 | 0.01 | 0.81 | 0.16 |
| LUMO+5 | -0.761         | 0.00        | 0.01 | 0.03 | 0.04 | 0.92 |

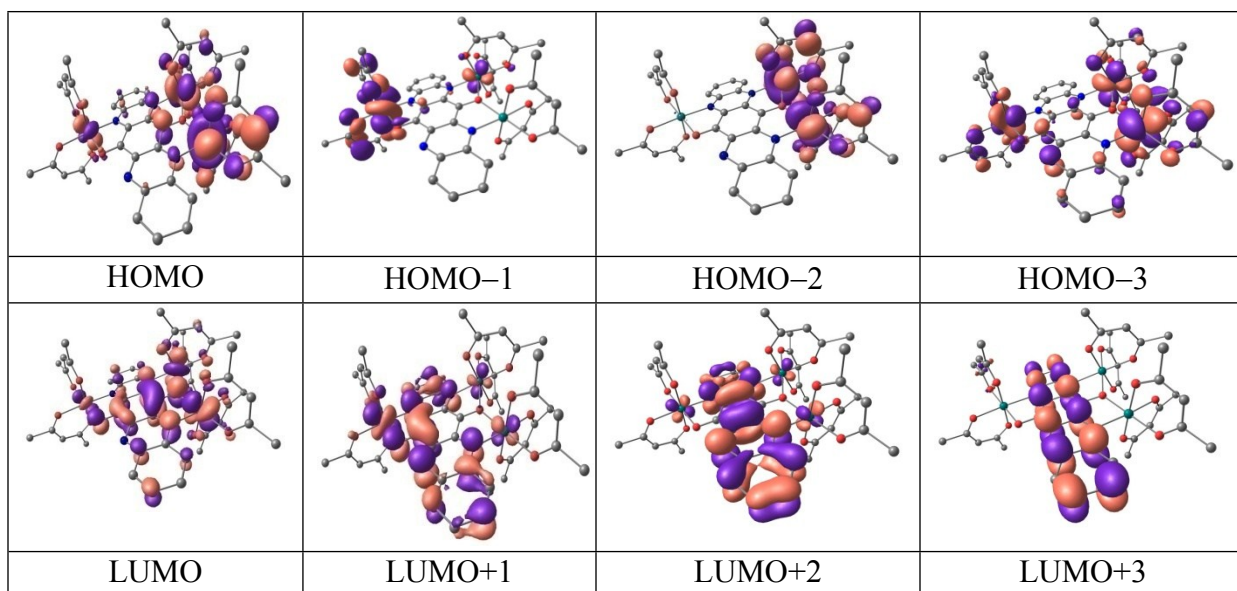

**Table S10** Composition and energy of selected molecular orbitals of **1** ( $S=1$ ) (Molecule A)

| MO     | Energy<br>(eV) | Composition |                |      |      |      |  |
|--------|----------------|-------------|----------------|------|------|------|--|
|        |                | Ru1         | Ru2            | Ru3  | L    | acac |  |
|        |                |             | $\alpha$ -spin |      |      |      |  |
| HOMO-5 | -5.520         | 0.04        | 0.41           | 0.10 | 0.10 | 0.36 |  |
| HOMO-4 | -5.350         | 0.00        | 0.50           | 0.07 | 0.10 | 0.32 |  |
| HOMO-3 | -5.160         | 0.29        | 0.07           | 0.02 | 0.16 | 0.46 |  |
| HOMO-2 | -5.050         | 0.36        | 0.27           | 0.01 | 0.09 | 0.26 |  |
| SOMO2  | -4.834         | 0.33        | 0.31           | 0.01 | 0.11 | 0.24 |  |
| SOMO1  | -4.254         | 0.47        | 0.00           | 0.00 | 0.06 | 0.47 |  |
| LUMO   | -2.786         | 0.02        | 0.27           | 0.42 | 0.09 | 0.21 |  |
| LUMO+1 | -1.660         | 0.42        | 0.03           | 0.06 | 0.35 | 0.14 |  |
| LUMO+2 | -1.249         | 0.07        | 0.20           | 0.23 | 0.35 | 0.15 |  |
| LUMO+3 | -1.052         | 0.03        | 0.03           | 0.02 | 0.86 | 0.06 |  |
| LUMO+4 | -0.857         | 0.00        | 0.05           | 0.02 | 0.04 | 0.88 |  |
| LUMO+5 | -0.628         | 0.00        | 0.05           | 0.02 | 0.03 | 0.89 |  |
|        |                |             | $\beta$ -spin  |      |      |      |  |
| HOMO-5 | -5.349         | 0.14        | 0.01           | 0.01 | 0.80 | 0.04 |  |
| HOMO-4 | -5.160         | 0.02        | 0.01           | 0.2  | 0.91 | 0.03 |  |
| HOMO-3 | -4.937         | 0.00        | 0.03           | 0.01 | 0.03 | 0.92 |  |
| HOMO-2 | -4.845         | 0.00        | 0.02           | 0.02 | 0.03 | 0.94 |  |
| HOMO-1 | -4.719         | 0.00        | 0.00           | 0.06 | 0.04 | 0.90 |  |
| HOMO   | -4.394         | 0.03        | 0.01           | 0.01 | 0.65 | 0.31 |  |
| LUMO   | -3.234         | 0.00        | 0.16           | 0.19 | 0.12 | 0.53 |  |
| LUMO+1 | -2.408         | 0.04        | 0.01           | 0.01 | 0.19 | 0.75 |  |
| LUMO+2 | -2.360         | 0.00        | 0.07           | 0.20 | 0.18 | 0.54 |  |
| LUMO+3 | -1.724         | 0.03        | 0.05           | 0.13 | 0.62 | 0.17 |  |
| LUMO+4 | -1.142         | 0.01        | 0.03           | 0.36 | 0.31 | 0.28 |  |
| LUMO+5 | -0.983         | 0.01        | 0.04           | 0.07 | 0.82 | 0.05 |  |

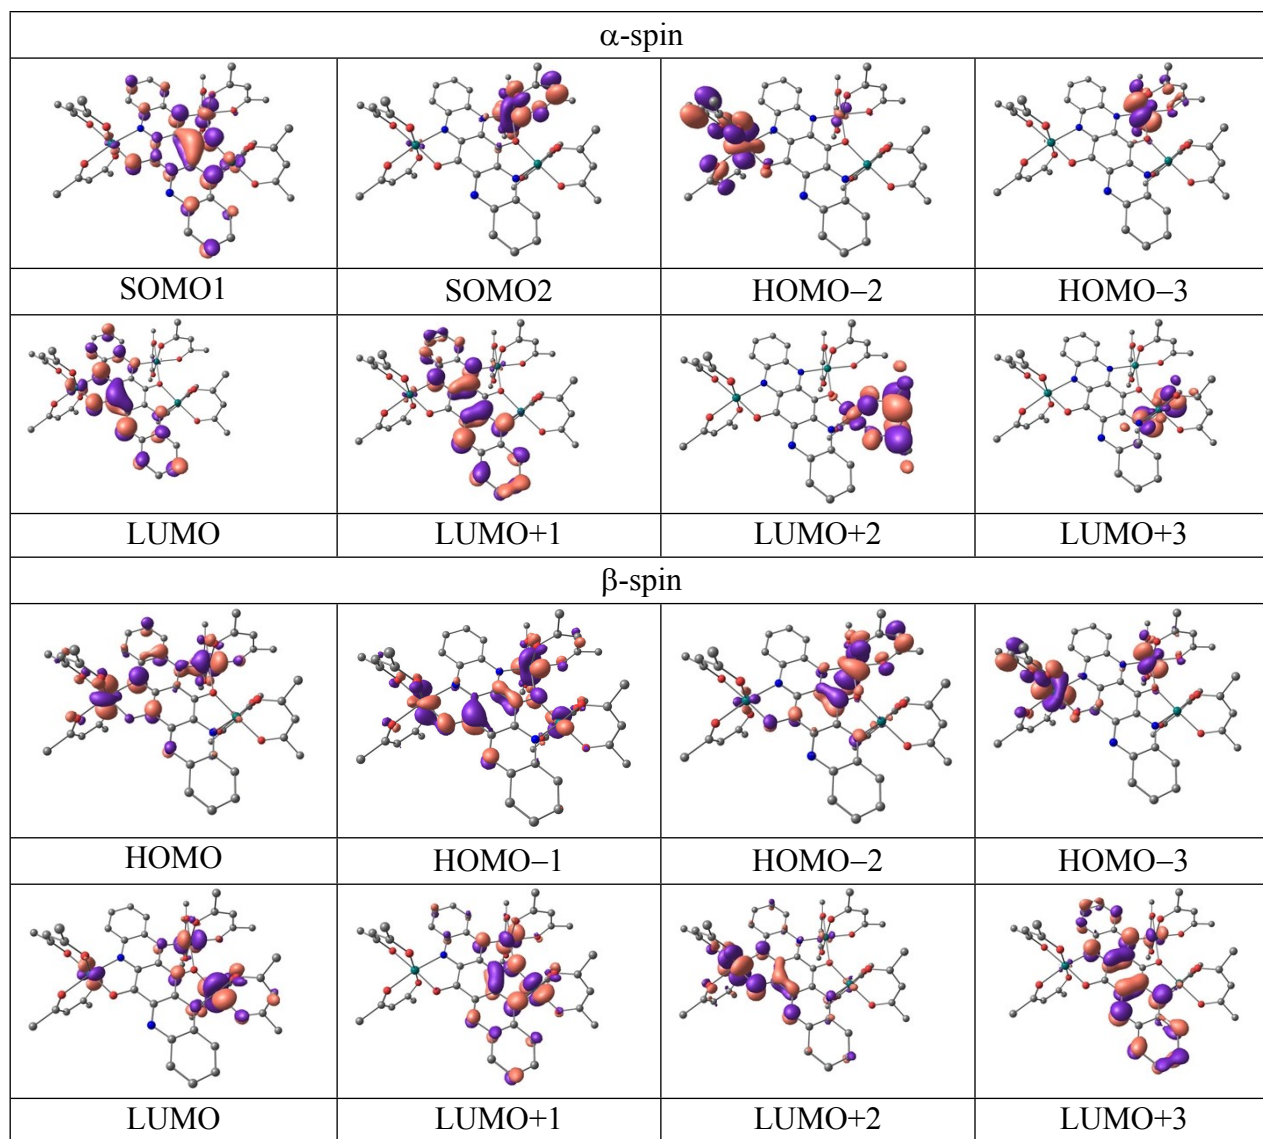



**Table S11** Composition and energy of selected molecular orbitals of  $1^+$  ( $S=1/2$ ) (Molecule A)

| MO     | Energy<br>(eV) | Composition |                |       |      |      |  |
|--------|----------------|-------------|----------------|-------|------|------|--|
|        |                | Ru1         | Ru2            | Ru3   | L    | acac |  |
|        |                |             | $\alpha$ -spin |       |      |      |  |
| HOMO-5 | -8.264         | 0.00        | 0.01           | 0.55  | 0.04 | 0.40 |  |
| HOMO-4 | -8.076         | 0.49        | 0.02           | 0.06  | 0.11 | 0.31 |  |
| HOMO-3 | -7.983         | 0.15        | 0.00           | 0.40  | 0.11 | 0.35 |  |
| HOMO-2 | -7.728         | 0.30        | 0.01           | 0.00  | 0.08 | 0.61 |  |
| HOMO-1 | -7.396         | 0.29        | 0.02           | 0.05  | 0.20 | 0.44 |  |
| SOMO   | -7.322         | 0.14        | 0.02           | 0.17  | 0.44 | 0.23 |  |
| LUMO   | -5.704         | 0.01        | 0.02           | 0.58  | 0.23 | 0.17 |  |
| LUMO+1 | -5.412         | 0.13        | 0.01           | 0.00  | 0.83 | 0.03 |  |
| LUMO+2 | -4.698         | 0.02        | 0.01           | 0.03  | 0.92 | 0.02 |  |
| LUMO+3 | -3.893         | 0.00        | 0.42           | 0.07  | 0.11 | 0.41 |  |
| LUMO+4 | -3.593         | 0.00        | 0.12           | 0.06  | 0.06 | 0.76 |  |
| LUMO+5 | -3.447         | 0.00        | 0.04           | 0.04  | 0.06 | 0.89 |  |
|        |                |             | $\beta$ -spin  |       |      |      |  |
| HOMO-5 | -8.283         | 0.00        | 0.01           | 0.26  | 0.05 | 0.68 |  |
| HOMO-4 | -8.076         | 0.29        | 0.02           | 0.00  | 0.07 | 0.62 |  |
| HOMO-3 | -7.963         | 0.00        | 0.01           | 0.390 | 0.04 | 0.56 |  |
| HOMO-2 | -7.688         | 0.60        | 0.01           | 0.00  | 0.08 | 0.31 |  |
| HOMO-1 | -7.495         | 0.34        | 0.02           | 0.00  | 0.30 | 0.33 |  |
| HOMO   | -7.044         | 0.38        | 0.03           | 0.01  | 0.28 | 0.30 |  |
| LUMO   | -6.118         | 0.08        | 0.52           | 0.01  | 0.21 | 0.19 |  |
| LUMO+1 | -5.761         | 0.03        | 0.25           | 0.04  | 0.60 | 0.09 |  |
| LUMO+2 | -5.231         | 0.43        | 0.01           | 0.00  | 0.46 | 0.10 |  |
| LUMO+3 | -4.617         | 0.02        | 0.02           | 0.02  | 0.91 | 0.02 |  |
| LUMO+4 | -3.750         | 0.00        | 0.25           | 0.11  | 0.08 | 0.56 |  |
| LUMO+5 | -3.557         | 0.00        | 0.09           | 0.20  | 0.08 | 0.62 |  |

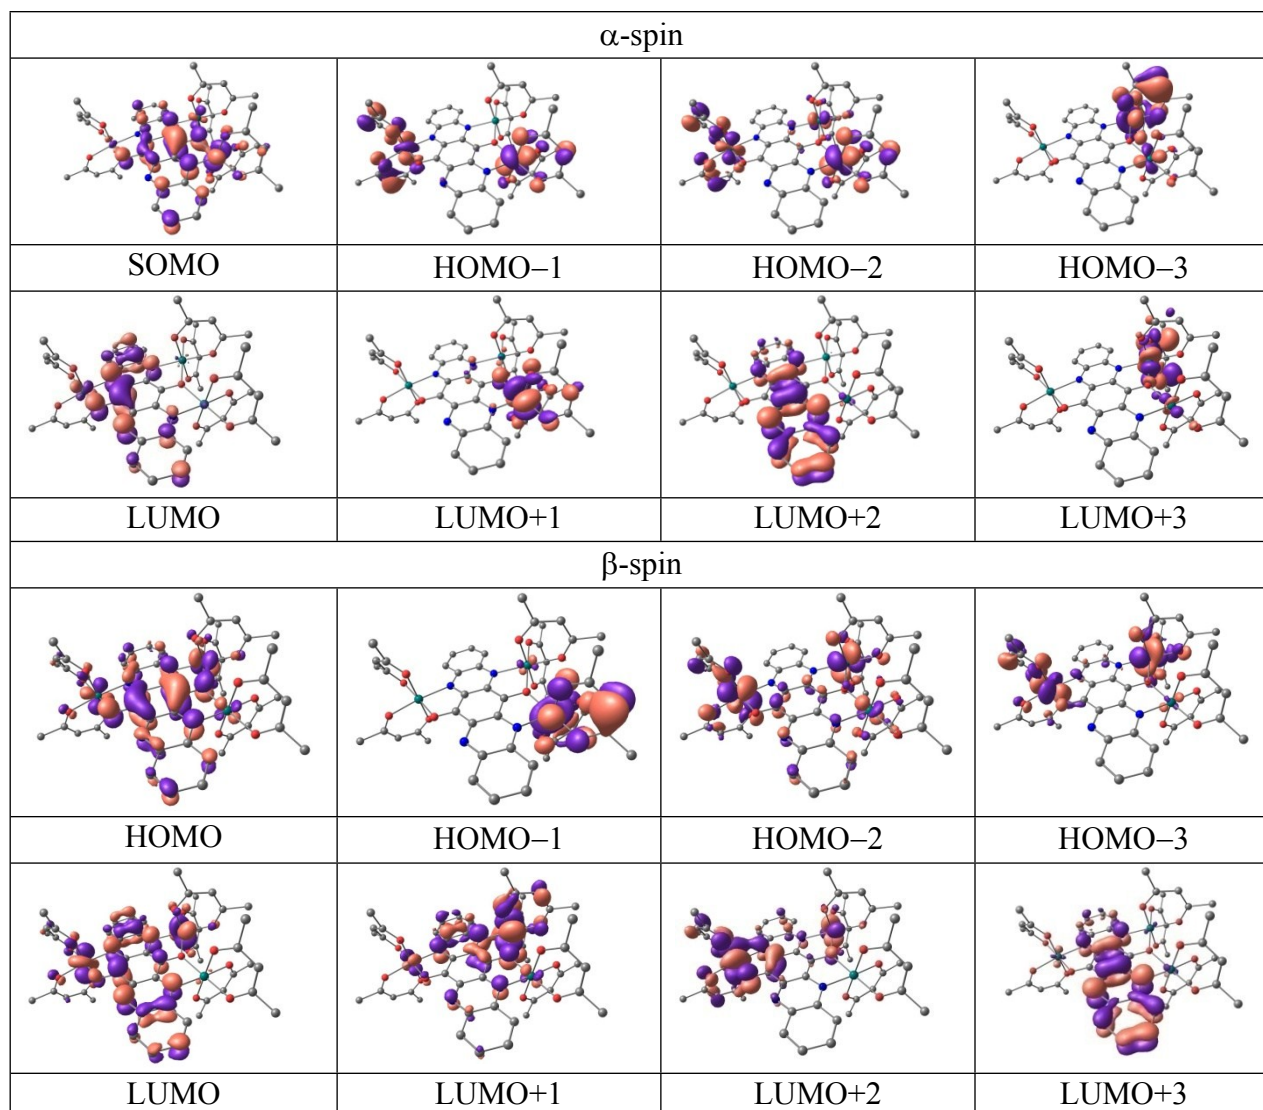

**Table S12** Composition and energy of selected molecular orbitals of  $1^{2+}$  ( $S=1$ ) (Molecule A)

| MO     | Energy<br>(eV) | Composition |                |      |      |      |  |
|--------|----------------|-------------|----------------|------|------|------|--|
|        |                | Ru1         | Ru2            | Ru3  | L    | acac |  |
|        |                |             | $\alpha$ -spin |      |      |      |  |
| HOMO-5 | -10.696        | 0.02        | 0.02           | 0.59 | 0.07 | 0.31 |  |
| HOMO-4 | -10.679        | 0.18        | 0.01           | 0.05 | 0.06 | 0.71 |  |
| HOMO-3 | -10.534        | 0.00        | 0.23           | 0.02 | 0.02 | 0.73 |  |
| HOMO-2 | -10.341        | 0.04        | 0.02           | 0.44 | 0.14 | 0.37 |  |
| SOMO2  | -10.257        | 0.22        | 0.00           | 0.07 | 0.03 | 0.67 |  |
| SOMO1  | -9.824         | 0.03        | 0.01           | 0.30 | 0.33 | 0.33 |  |
| LUMO   | -8.550         | 0.02        | 0.03           | 0.36 | 0.44 | 0.15 |  |
| LUMO+1 | -8.132         | 0.06        | 0.02           | 0.04 | 0.85 | 0.03 |  |
| LUMO+2 | -7.043         | 0.01        | 0.01           | 0.03 | 0.95 | 0.01 |  |
| LUMO+3 | -6.072         | 0.00        | 0.34           | 0.06 | 0.12 | 0.48 |  |
| LUMO+4 | -5.841         | 0.00        | 0.00           | 0.00 | 0.98 | 0.02 |  |
| LUMO+5 | -5.764         | 0.00        | 0.20           | 0.09 | 0.12 | 0.58 |  |
|        |                |             | $\beta$ -spin  |      |      |      |  |
| HOMO-5 | -10.711        | 0.07        | 0.04           | 0.47 | 0.10 | 0.31 |  |
| HOMO-4 | -10.625        | 0.07        | 0.23           | 0.05 | 0.08 | 0.57 |  |
| HOMO-3 | -10.593        | 0.28        | 0.10           | 0.05 | 0.08 | 0.49 |  |
| HOMO-2 | -10.518        | 0.17        | 0.01           | 0.19 | 0.07 | 0.56 |  |
| HOMO-1 | -10.382        | 0.28        | 0.01           | 0.05 | 0.10 | 0.56 |  |
| HOMO   | -9.651         | 0.04        | 0.03           | 0.31 | 0.31 | 0.32 |  |
| LUMO   | -8.751         | 0.04        | 0.09           | 0.28 | 0.37 | 0.22 |  |
| LUMO+1 | -8.145         | 0.12        | 0.03           | 0.02 | 0.77 | 0.05 |  |
| LUMO+2 | -8.026         | 0.07        | 0.56           | 0.02 | 0.08 | 0.28 |  |
| LUMO+3 | -7.766         | 0.53        | 0.07           | 0.01 | 0.14 | 0.25 |  |
| LUMO+4 | -7.013         | 0.03        | 0.02           | 0.02 | 0.92 | 0.02 |  |
| LUMO+5 | -5.935         | 0.00        | 0.20           | 0.06 | 0.08 | 0.66 |  |

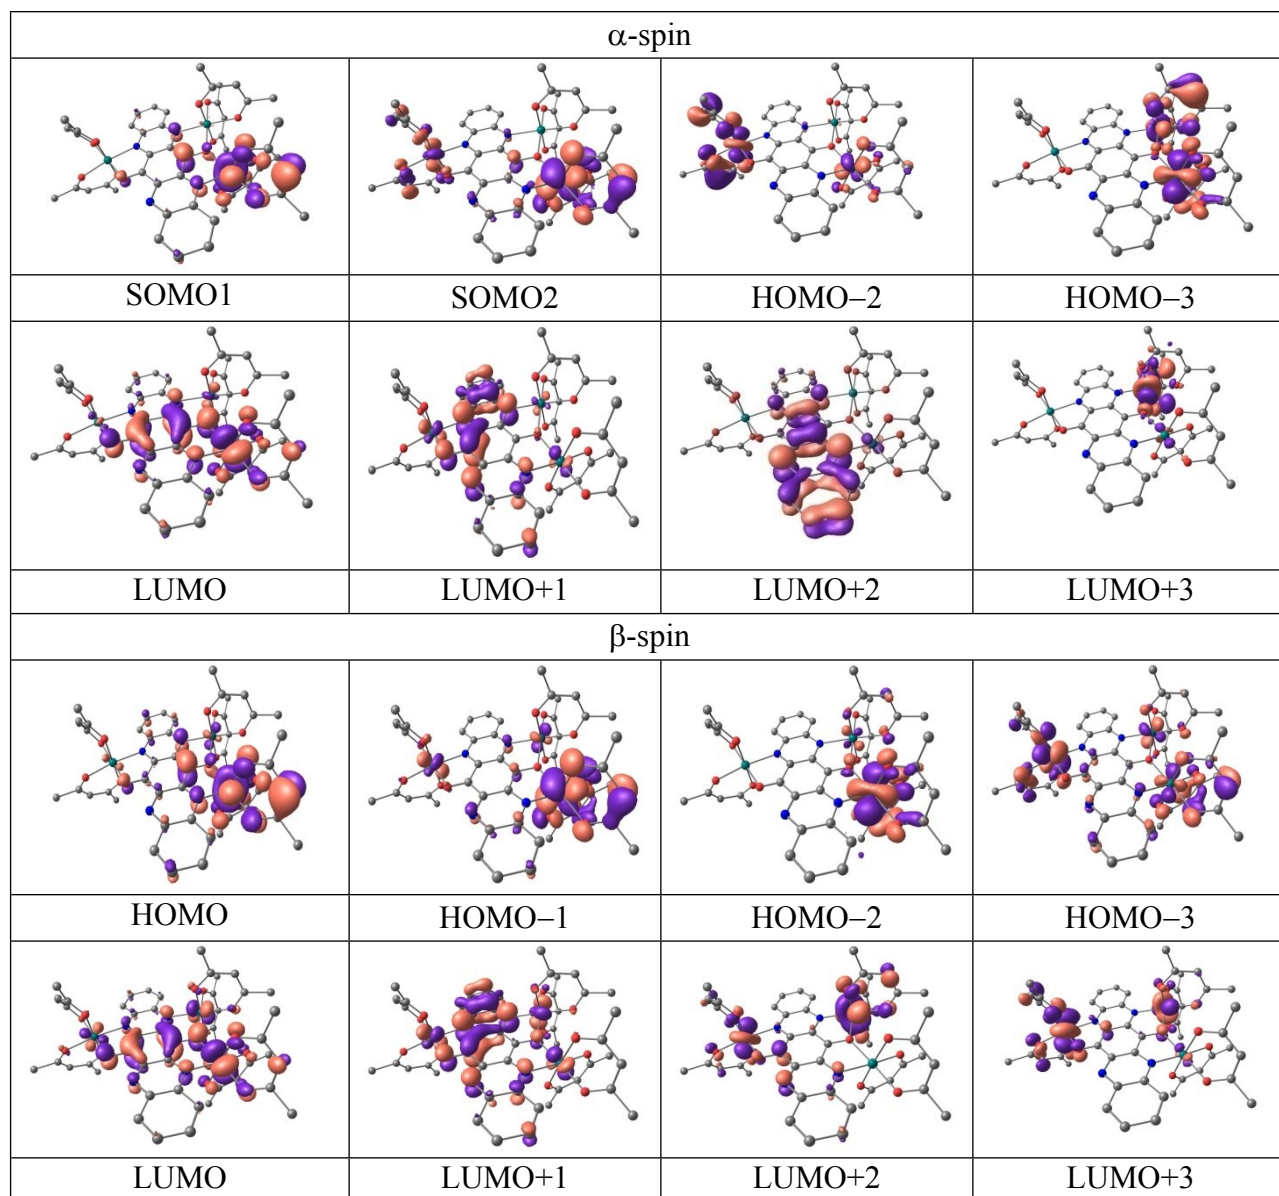

**Table S13** Composition and energy of selected molecular orbitals of **1<sup>-</sup>** (*S*=1/2) (Molecule A)

| MO             | Energy<br>(eV) | Composition |      |      |      |      |
|----------------|----------------|-------------|------|------|------|------|
|                |                | Ru1         | Ru2  | Ru3  | L    | acac |
| $\alpha$ -spin |                |             |      |      |      |      |
| HOMO-5         | -2.529         | 0.15        | 0.16 | 0.37 | 0.08 | 0.25 |
| HOMO-4         | -2.464         | 0.01        | 0.29 | 0.47 | 0.06 | 0.16 |
| HOMO-3         | -2.373         | 0.54        | 0.12 | 0.01 | 0.07 | 0.25 |
| HOMO-2         | -2.142         | 0.04        | 0.36 | 0.30 | 0.04 | 0.26 |
| HOMO-1         | -2.019         | 0.04        | 0.27 | 0.36 | 0.08 | 0.25 |
| SOMO           | -1.472         | 0.03        | 0.15 | 0.15 | 0.59 | 0.09 |
| LUMO           | -0.473         | 0.18        | 0.02 | 0.02 | 0.72 | 0.05 |
| LUMO+1         | 0.433          | 0.03        | 0.02 | 0.03 | 0.90 | 0.02 |
| LUMO+2         | 1.439          | 0.03        | 0.00 | 0.00 | 0.06 | 0.91 |
| LUMO+3         | 1.589          | 0.04        | 0.00 | 0.00 | 0.03 | 0.92 |
| LUMO+4         | 1.647          | 0.00        | 0.03 | 0.01 | 0.03 | 0.93 |
| LUMO+5         | 1.663          | 0.00        | 0.01 | 0.03 | 0.07 | 0.88 |
| $\beta$ -spin  |                |             |      |      |      |      |
| HOMO-5         | -2.463         | 0.17        | 0.29 | 0.26 | 0.09 | 0.20 |
| HOMO-4         | -2.359         | 0.00        | 0.35 | 0.42 | 0.07 | 0.16 |
| HOMO-3         | -2.310         | 0.28        | 0.08 | 0.25 | 0.18 | 0.20 |
| HOMO-2         | -2.108         | 0.06        | 0.36 | 0.30 | 0.08 | 0.21 |
| HOMO-1         | -1.876         | 0.01        | 0.56 | 0.09 | 0.11 | 0.22 |
| HOMO           | -1.832         | 0.02        | 0.11 | 0.57 | 0.09 | 0.22 |
| LUMO           | -0.369         | 0.16        | 0.02 | 0.01 | 0.76 | 0.05 |
| LUMO+1         | -0.019         | 0.00        | 0.19 | 0.18 | 0.52 | 0.10 |
| LUMO+2         | 0.511          | 0.02        | 0.03 | 0.03 | 0.89 | 0.03 |
| LUMO+3         | 1.437          | 0.03        | 0.00 | 0.00 | 0.05 | 0.91 |
| LUMO+4         | 1.593          | 0.04        | 0.00 | 0.00 | 0.03 | 0.92 |
| LUMO+5         | 1.670          | 0.00        | 0.02 | 0.03 | 0.03 | 0.92 |

| $\alpha$ -spin                                                                      |                                                                                     |                                                                                      |                                                                                       |
|-------------------------------------------------------------------------------------|-------------------------------------------------------------------------------------|--------------------------------------------------------------------------------------|---------------------------------------------------------------------------------------|
| 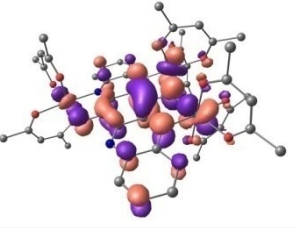   |    |    |    |
| SOMO                                                                                | HOMO-1                                                                              | HOMO-2                                                                               | HOMO-3                                                                                |
|    |    |    |    |
| LUMO                                                                                | LUMO+1                                                                              | LUMO+2                                                                               | LUMO+3                                                                                |
| $\beta$ -spin                                                                       |                                                                                     |                                                                                      |                                                                                       |
|   |   |   |   |
| HOMO                                                                                | HOMO-1                                                                              | HOMO-2                                                                               | HOMO-3                                                                                |
|  |  |  |  |
| LUMO                                                                                | LUMO+1                                                                              | LUMO+2                                                                               | LUMO+3                                                                                |

**Table S14** Composition and energy of selected molecular orbitals of  $1^{2-}$  ( $S=1$ ) (Molecule A)

| MO     | Energy<br>(eV) | Composition |                |      |      |                   |  |
|--------|----------------|-------------|----------------|------|------|-------------------|--|
|        |                | Ru1         | Ru2            | Ru3  | L    | acac <sup>-</sup> |  |
|        |                |             | $\alpha$ -spin |      |      |                   |  |
| HOMO-5 | 0.124          | 0.67        | 0.06           | 0.02 | 0.08 | 0.16              |  |
| HOMO-4 | 0.253          | 0.08        | 0.23           | 0.42 | 0.05 | 0.22              |  |
| HOMO-3 | 0.389          | 0.07        | 0.37           | 0.27 | 0.08 | 0.21              |  |
| HOMO-2 | 0.451          | 0.67        | 0.07           | 0.01 | 0.06 | 0.19              |  |
| SOMO2  | 0.937          | 0.06        | 0.14           | 0.14 | 0.59 | 0.08              |  |
| SOMO1  | 1.366          | 0.14        | 0.03           | 0.03 | 0.76 | 0.04              |  |
| LUMO   | 2.919          | 0.02        | 0.02           | 0.02 | 0.03 | 0.91              |  |
| LUMO+1 | 3.813          | 0.00        | 0.00           | 0.04 | 0.04 | 0.92              |  |
| LUMO+2 | 3.846          | 0.00        | 0.04           | 0.00 | 0.03 | 0.93              |  |
| LUMO+3 | 3.926          | 0.03        | 0.00           | 0.00 | 0.04 | 0.93              |  |
| LUMO+4 | 4.035          | 0.06        | 0.00           | 0.00 | 0.04 | 0.90              |  |
| LUMO+5 | 4.095          | 0.00        | 0.03           | 0.04 | 0.04 | 0.91              |  |
|        |                |             | $\beta$ -spin  |      |      |                   |  |
| HOMO-5 | 0.201          | 0.18        | 0.11           | 0.41 | 0.12 | 0.18              |  |
| HOMO-4 | 0.248          | 0.65        | 0.05           | 0.03 | 0.12 | 0.15              |  |
| HOMO-3 | 0.376          | 0.13        | 0.12           | 0.49 | 0.06 | 0.21              |  |
| HOMO-2 | 0.435          | 0.21        | 0.36           | 0.13 | 0.09 | 0.19              |  |
| HOMO-1 | 0.573          | 0.47        | 0.22           | 0.06 | 0.08 | 0.17              |  |
| HOMO   | 0.623          | 0.32        | 0.23           | 0.15 | 0.13 | 0.17              |  |
| LUMO   | 2.429          | 0.01        | 0.15           | 0.14 | 0.63 | 0.08              |  |
| LUMO+1 | 2.830          | 0.14        | 0.01           | 0.01 | 0.79 | 0.05              |  |
| LUMO+2 | 3.377          | 0.03        | 0.02           | 0.02 | 0.86 | 0.08              |  |
| LUMO+3 | 3.835          | 0.00        | 0.00           | 0.05 | 0.05 | 0.89              |  |
| LUMO+4 | 3.877          | 0.00        | 0.06           | 0.00 | 0.04 | 0.90              |  |
| LUMO+5 | 3.936          | 0.04        | 0.00           | 0.00 | 0.05 | 0.91              |  |

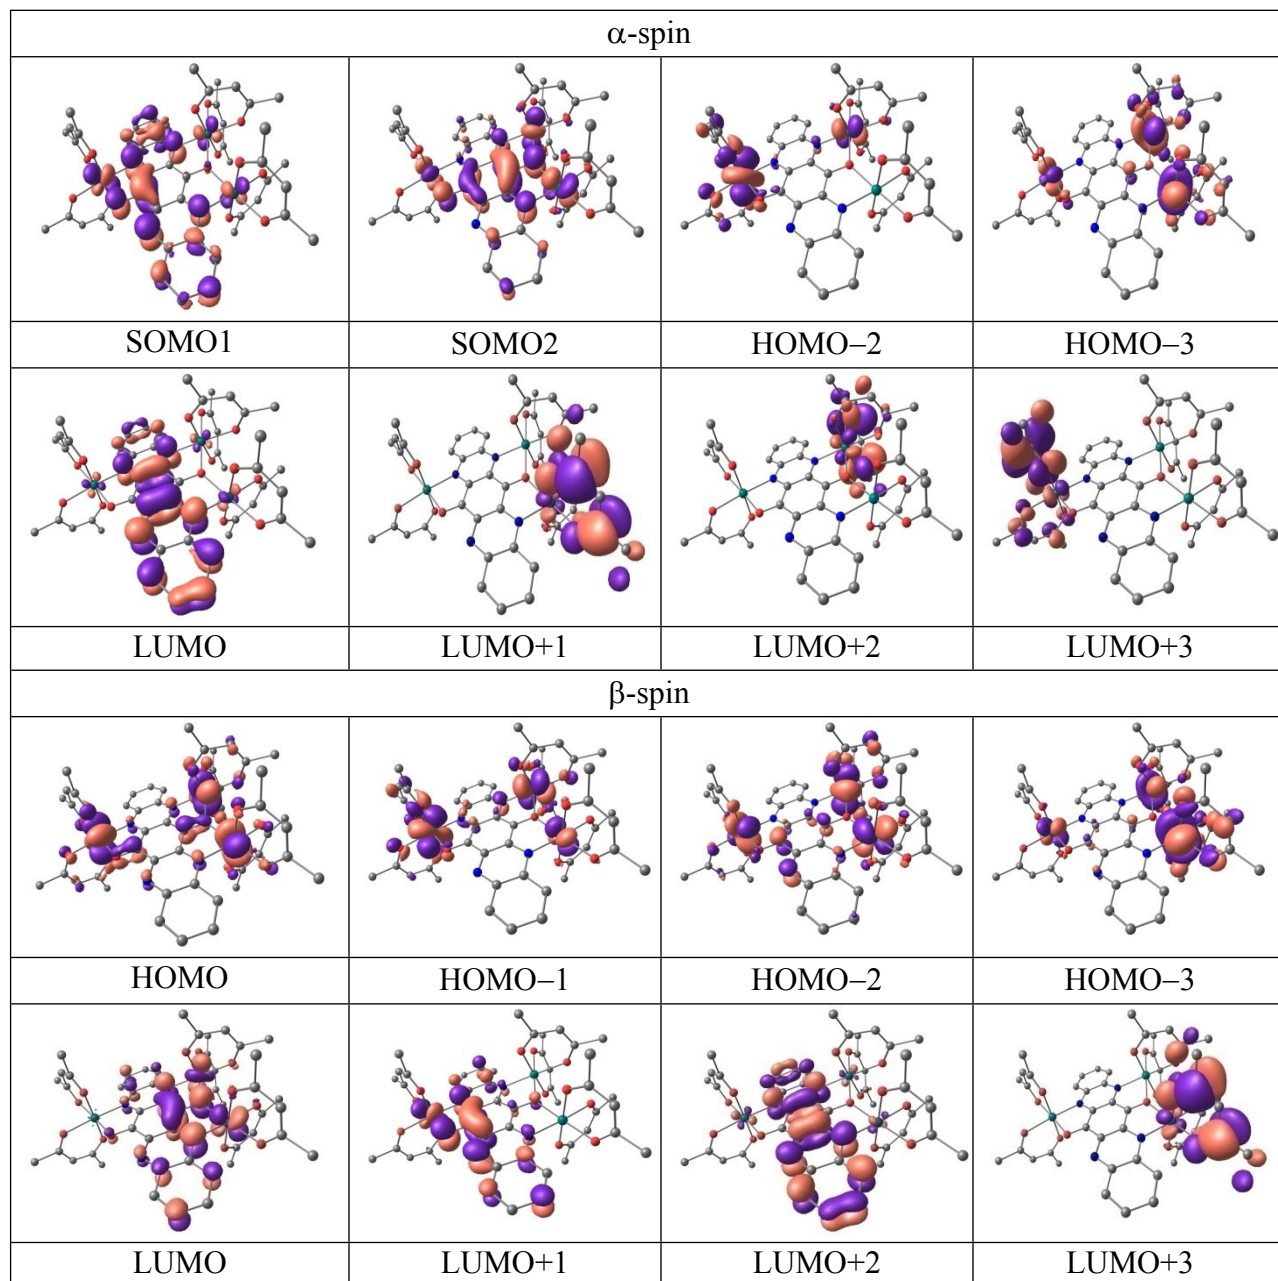



**Table S15** Composition and energy of selected molecular orbitals of  $1^{3-}$  ( $S=1/2$ ) (Molecule A)

| MO             | Energy<br>(eV) | Composition |      |      |      |      |
|----------------|----------------|-------------|------|------|------|------|
|                |                | Ru1         | Ru2  | Ru3  | L    | acac |
| $\alpha$ -spin |                |             |      |      |      |      |
| HOMO-5         | 2.856          | 0.00        | 0.55 | 0.25 | 0.05 | 0.15 |
| HOMO-4         | 2.908          | 0.06        | 0.43 | 0.29 | 0.05 | 0.17 |
| HOMO-3         | 3.085          | 0.01        | 0.31 | 0.46 | 0.04 | 0.18 |
| HOMO-2         | 3.212          | 0.04        | 0.39 | 0.25 | 0.16 | 0.16 |
| HOMO-1         | 3.748          | 0.11        | 0.07 | 0.05 | 0.72 | 0.05 |
| SOMO           | 4.213          | 0.01        | 0.14 | 0.12 | 0.67 | 0.07 |
| LUMO           | 5.689          | 0.01        | 0.01 | 0.02 | 0.88 | 0.08 |
| LUMO+1         | 5.941          | 0.03        | 0.00 | 0.00 | 0.03 | 0.94 |
| LUMO+2         | 6.046          | 0.07        | 0.00 | 0.00 | 0.04 | 0.89 |
| LUMO+3         | 6.292          | 0.00        | 0.00 | 0.05 | 0.05 | 0.90 |
| LUMO+4         | 6.344          | 0.00        | 0.06 | 0.00 | 0.03 | 0.91 |
| LUMO+5         | 6.574          | 0.00        | 0.04 | 0.06 | 0.04 | 0.87 |
| $\beta$ -spin  |                |             |      |      |      |      |
| HOMO-5         | 2.825          | 0.40        | 0.01 | 0.31 | 0.11 | 0.15 |
| HOMO-4         | 2.860          | 0.00        | 0.58 | 0.22 | 0.05 | 0.15 |
| HOMO-3         | 2.933          | 0.11        | 0.48 | 0.19 | 0.06 | 0.17 |
| HOMO-2         | 3.110          | 0.02        | 0.29 | 0.47 | 0.04 | 0.18 |
| HOMO-1         | 3.286          | 0.02        | 0.26 | 0.45 | 0.10 | 0.17 |
| HOMO           | 4.258          | 0.01        | 0.12 | 0.12 | 0.69 | 0.07 |
| LUMO           | 5.259          | 0.09        | 0.01 | 0.01 | 0.82 | 0.07 |
| LUMO+1         | 5.893          | 0.01        | 0.01 | 0.01 | 0.58 | 0.39 |
| LUMO+2         | 5.978          | 0.05        | 0.00 | 0.00 | 0.21 | 0.73 |
| LUMO+3         | 6.062          | 0.07        | 0.00 | 0.00 | 0.05 | 0.88 |
| LUMO+4         | 6.290          | 0.00        | 0.00 | 0.05 | 0.05 | 0.89 |
| LUMO+5         | 6.356          | 0.00        | 0.06 | 0.00 | 0.05 | 0.89 |

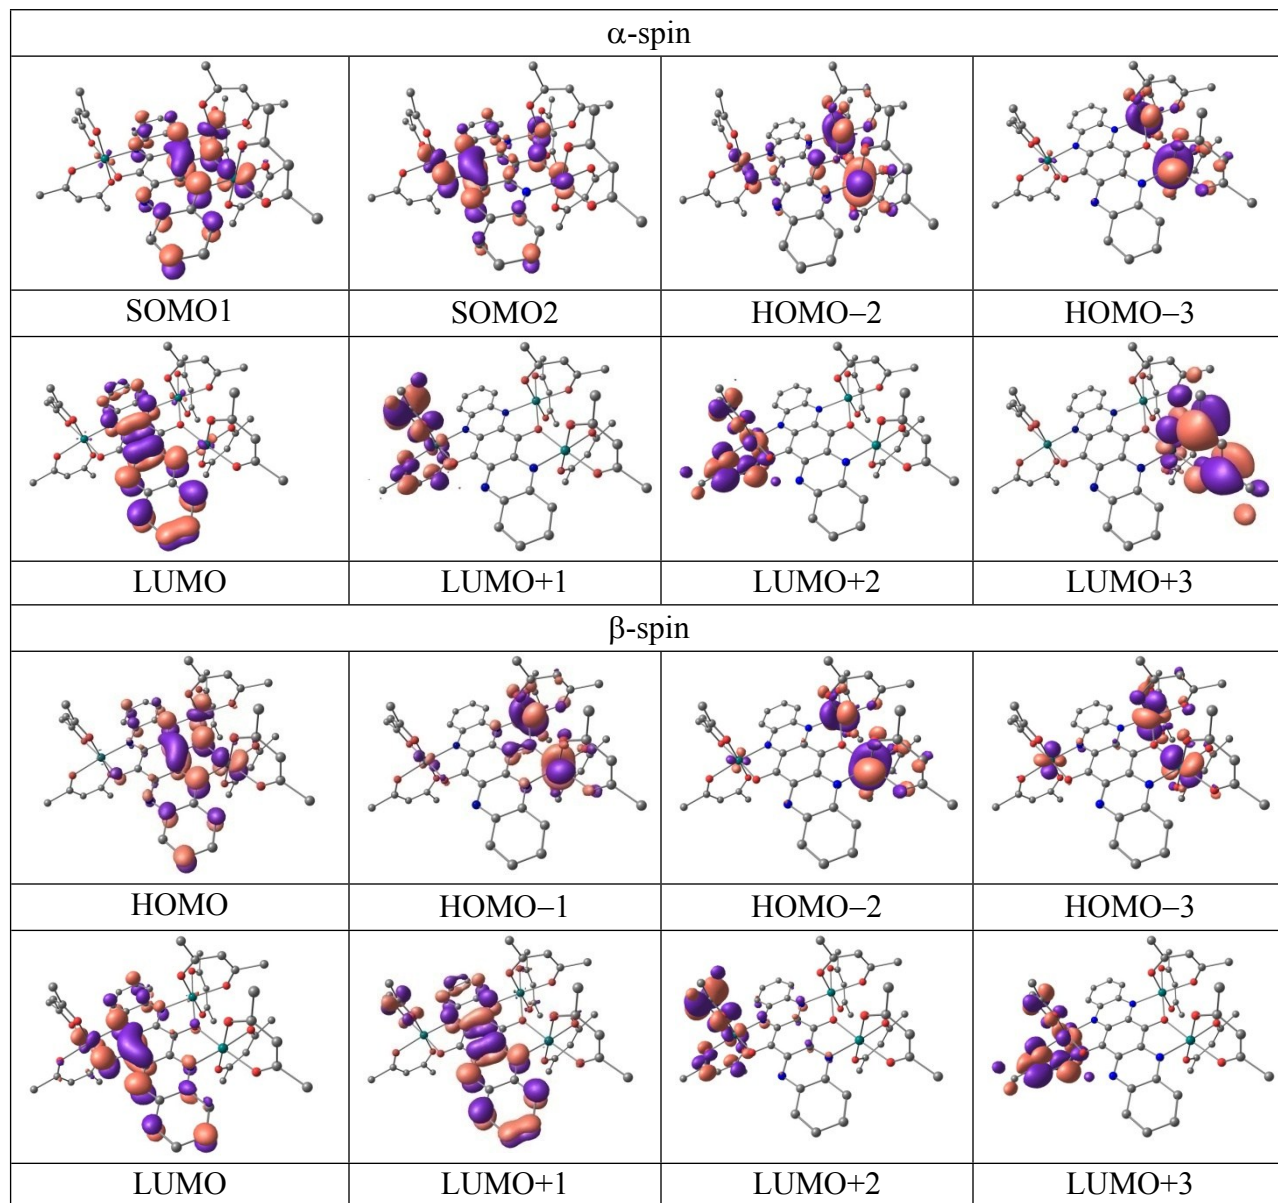

**Table S16** Composition and energy of selected molecular orbitals of **2** ( $S=0$ )

| MO     | Energy<br>(eV) | Composition |      |      |      |
|--------|----------------|-------------|------|------|------|
|        |                | Ru1         | Ru2  | L    | acac |
| HOMO-5 | -5.120         | 0.36        | 0.34 | 0.05 | 0.24 |
| HOMO-4 | -4.878         | 0.39        | 0.36 | 0.06 | 0.19 |
| HOMO-3 | -4.662         | 0.18        | 0.41 | 0.13 | 0.28 |
| HOMO-2 | -4.556         | 0.23        | 0.40 | 0.02 | 0.35 |
| HOMO-1 | -4.544         | 0.43        | 0.19 | 0.02 | 0.35 |
| HOMO   | -4.330         | 0.36        | 0.18 | 0.17 | 0.28 |
| LUMO   | -3.213         | 0.25        | 0.24 | 0.36 | 0.14 |
| LUMO+1 | -2.980         | 0.17        | 0.18 | 0.57 | 0.09 |
| LUMO+2 | -2.097         | 0.04        | 0.04 | 0.90 | 0.02 |
| LUMO+3 | -0.813         | 0.05        | 0.00 | 0.07 | 0.87 |
| LUMO+4 | -0.810         | 0.06        | 0.00 | 0.03 | 0.91 |
| LUMO+5 | -0.790         | 0.01        | 0.00 | 0.91 | 0.08 |

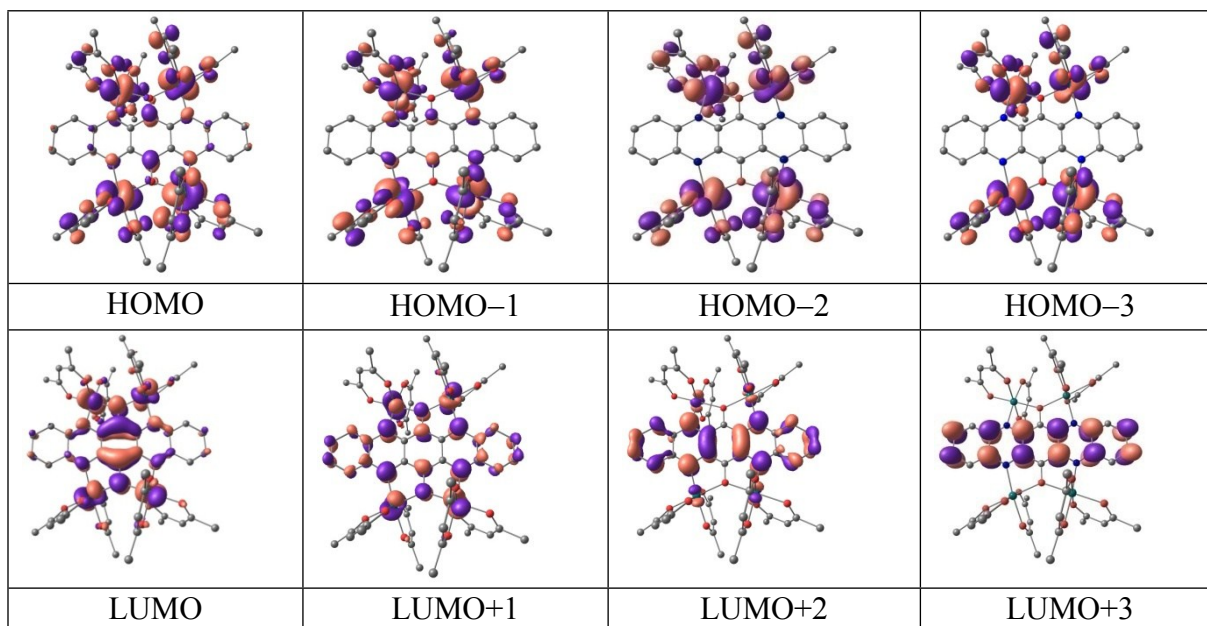

**Table S17** Composition and energy of selected molecular orbitals of **2** ( $S=1$ )

| MO     | Energy<br>(eV) | Composition |                |      |      |
|--------|----------------|-------------|----------------|------|------|
|        |                | Ru1         | Ru2            | L    | acac |
|        |                |             | $\alpha$ -spin |      |      |
| HOMO-5 | -5.109         | 0.05        | 0.71           | 0.06 | 0.18 |
| HOMO-4 | -5.096         | 0.20        | 0.49           | 0.05 | 0.27 |
| HOMO-3 | -5.075         | 0.03        | 0.60           | 0.15 | 0.22 |
| HOMO-2 | -4.506         | 0.03        | 0.48           | 0.22 | 0.28 |
| SOMO2  | -4.358         | 0.03        | 0.41           | 0.31 | 0.24 |
| SOMO1  | -3.872         | 0.30        | 0.04           | 0.54 | 0.12 |
| LUMO   | -2.680         | 0.04        | 0.41           | 0.43 | 0.12 |
| LUMO+1 | -1.852         | 0.02        | 0.05           | 0.91 | 0.03 |
| LUMO+2 | -1.260         | 0.09        | 0.00           | 0.04 | 0.86 |
| LUMO+3 | -0.927         | 0.04        | 0.01           | 0.03 | 0.93 |
| LUMO+4 | -0.921         | 0.07        | 0.00           | 0.04 | 0.89 |
| LUMO+5 | -0.734         | 0.00        | 0.06           | 0.03 | 0.90 |
|        |                |             | $\beta$ -spin  |      |      |
| HOMO-5 | -5.161         | 0.56        | 0.09           | 0.08 | 0.27 |
| HOMO-4 | -4.903         | 0.03        | 0.74           | 0.06 | 0.17 |
| HOMO-3 | -4.643         | 0.02        | 0.56           | 0.09 | 0.33 |
| HOMO-2 | -4.595         | 0.05        | 0.54           | 0.18 | 0.23 |
| HOMO-1 | -4.385         | 0.19        | 0.24           | 0.37 | 0.20 |
| HOMO   | -3.877         | 0.15        | 0.39           | 0.25 | 0.21 |
| LUMO   | -3.125         | 0.63        | 0.05           | 0.12 | 0.21 |
| LUMO+1 | -2.662         | 0.48        | 0.05           | 0.33 | 0.14 |
| LUMO+2 | -2.422         | 0.14        | 0.32           | 0.42 | 0.12 |
| LUMO+3 | -1.708         | 0.03        | 0.05           | 0.88 | 0.04 |
| LUMO+4 | -1.217         | 0.07        | 0.00           | 0.04 | 0.89 |
| LUMO+5 | -0.893         | 0.06        | 0.00           | 0.04 | 0.90 |

| $\alpha$ -spin                                                                      |                                                                                     |                                                                                      |                                                                                       |
|-------------------------------------------------------------------------------------|-------------------------------------------------------------------------------------|--------------------------------------------------------------------------------------|---------------------------------------------------------------------------------------|
| 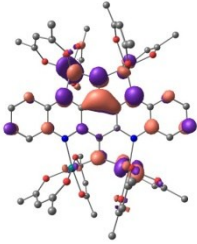   |    |    |    |
| SOMO1                                                                               | SOMO2                                                                               | HOMO-2                                                                               | HOMO-3                                                                                |
|    |    |    |    |
| LUMO                                                                                | LUMO+1                                                                              | LUMO+2                                                                               | LUMO+3                                                                                |
| $\beta$ -spin                                                                       |                                                                                     |                                                                                      |                                                                                       |
|   |   |   |   |
| HOMO                                                                                | HOMO-1                                                                              | HOMO-2                                                                               | HOMO-3                                                                                |
|  |  |  |  |
| LUMO                                                                                | LUMO+1                                                                              | LUMO+2                                                                               | LUMO+3                                                                                |

**Table S18** Composition and energy of selected molecular orbitals of  $2^+$  ( $S=1/2$ )

| MO     | Energy<br>(eV) | Composition |                |      |      |
|--------|----------------|-------------|----------------|------|------|
|        |                | Ru1         | Ru2            | L    | acac |
|        |                |             | $\alpha$ -spin |      |      |
| HOMO-5 | -7.495         | 0.07        | 0.52           | 0.15 | 0.25 |
| HOMO-4 | -7.466         | 0.05        | 0.65           | 0.10 | 0.21 |
| HOMO-3 | -7.342         | 0.03        | 0.38           | 0.34 | 0.24 |
| HOMO-2 | -7.194         | 0.08        | 0.43           | 0.22 | 0.26 |
| HOMO-1 | -7.016         | 0.02        | 0.50           | 0.20 | 0.28 |
| SOMO   | -6.664         | 0.03        | 0.38           | 0.41 | 0.18 |
| LUMO   | -5.072         | 0.05        | 0.41           | 0.39 | 0.15 |
| LUMO+1 | -4.854         | 0.02        | 0.43           | 0.40 | 0.15 |
| LUMO+2 | -4.419         | 0.03        | 0.16           | 0.74 | 0.07 |
| LUMO+3 | -3.139         | 0.12        | 0.01           | 0.07 | 0.80 |
| LUMO+4 | -3.132         | 0.11        | 0.01           | 0.05 | 0.84 |
| LUMO+5 | -2.893         | 0.00        | 0.02           | 0.73 | 0.25 |
|        |                |             | $\beta$ -spin  |      |      |
| HOMO-5 | -7.649         | 0.09        | 0.13           | 0.12 | 0.67 |
| HOMO-4 | -7.640         | 0.04        | 0.57           | 0.08 | 0.31 |
| HOMO-3 | -7.517         | 0.21        | 0.28           | 0.10 | 0.41 |
| HOMO-2 | -7.191         | 0.02        | 0.54           | 0.06 | 0.38 |
| HOMO-1 | -7.159         | 0.07        | 0.52           | 0.06 | 0.35 |
| HOMO   | -6.625         | 0.18        | 0.15           | 0.54 | 0.13 |
| LUMO   | -5.471         | 0.35        | 0.06           | 0.44 | 0.15 |
| LUMO+1 | -5.108         | 0.33        | 0.06           | 0.46 | 0.14 |
| LUMO+2 | -5.047         | 0.58        | 0.03           | 0.18 | 0.21 |
| LUMO+3 | -4.290         | 0.05        | 0.06           | 0.86 | 0.03 |
| LUMO+4 | -3.090         | 0.09        | 0.00           | 0.06 | 0.84 |
| LUMO+5 | -3.088         | 0.09        | 0.01           | 0.04 | 0.87 |

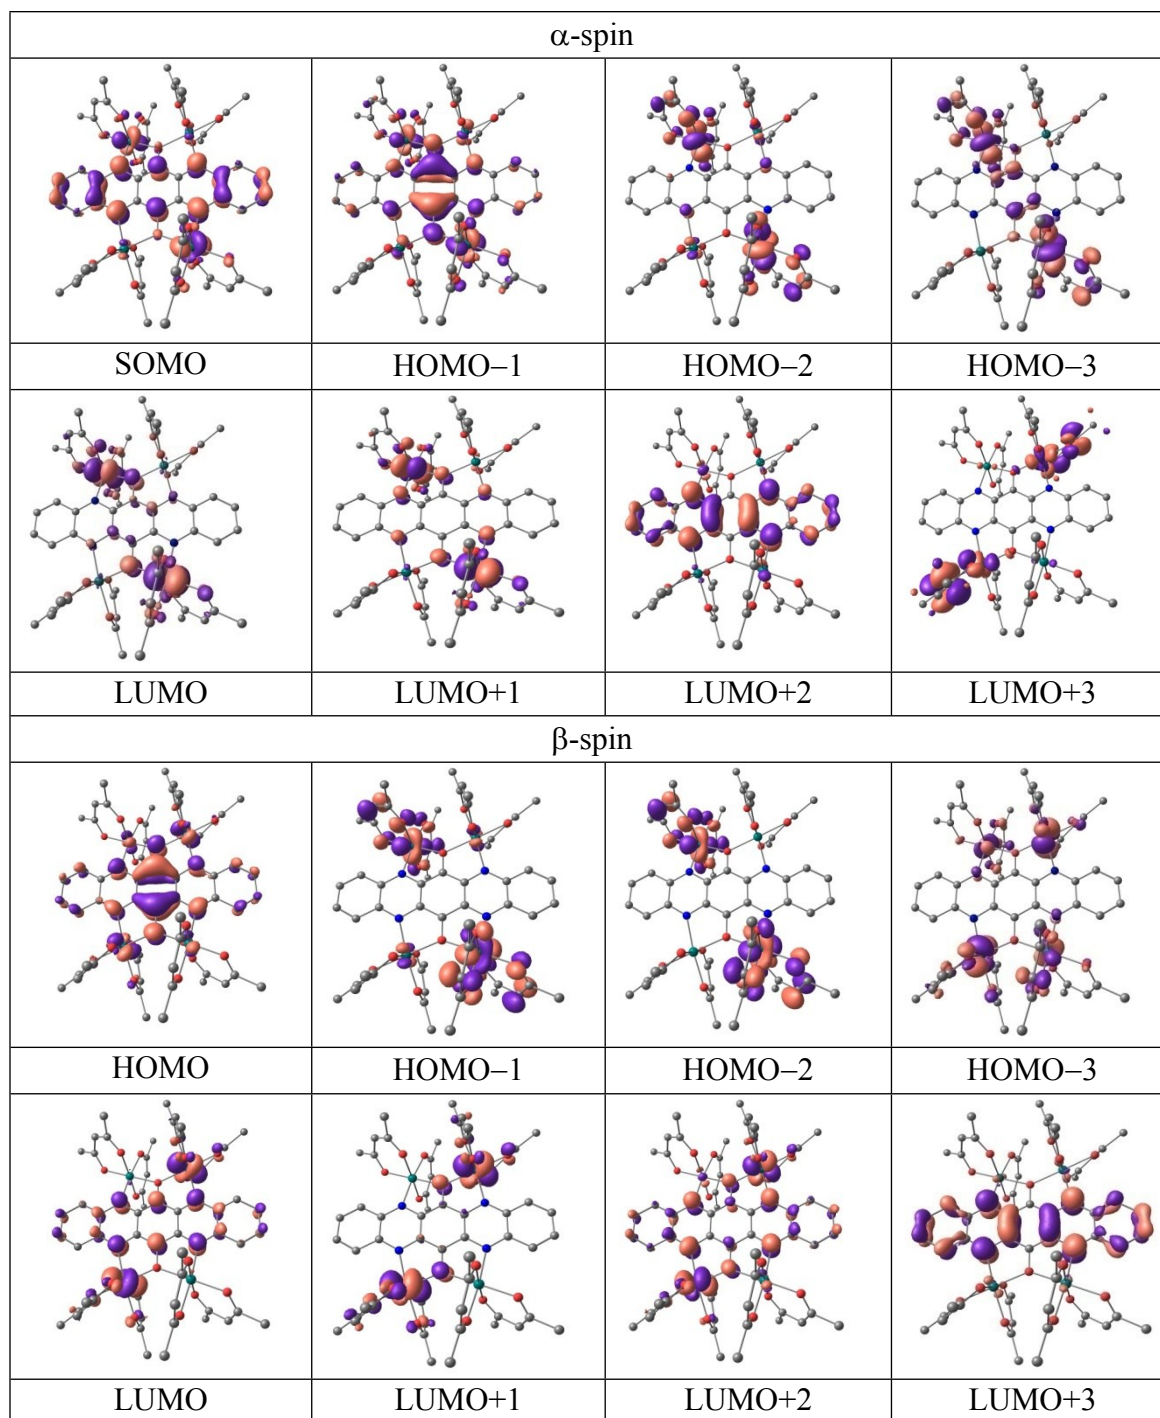

**Table S19** Composition and energy of selected molecular orbitals of  $2^{2+}$  ( $S=1$ )

| MO     | Energy<br>(eV) | Composition |                |      |      |
|--------|----------------|-------------|----------------|------|------|
|        |                | Ru1         | Ru2            | L    | acac |
|        |                |             | $\alpha$ -spin |      |      |
| HOMO-5 | -10.205        | 0.36        | 0.06           | 0.04 | 0.54 |
| HOMO-4 | -10.111        | 0.44        | 0.04           | 0.10 | 0.42 |
| HOMO-3 | -10.037        | 0.17        | 0.14           | 0.02 | 0.66 |
| HOMO-2 | -10.034        | 0.02        | 0.22           | 0.04 | 0.72 |
| SOMO2  | -9.902         | 0.14        | 0.15           | 0.03 | 0.68 |
| SOMO1  | -9.291         | 0.16        | 0.09           | 0.65 | 0.10 |
| LUMO   | -7.843         | 0.07        | 0.06           | 0.84 | 0.03 |
| LUMO+1 | -7.367         | 0.66        | 0.01           | 0.08 | 0.25 |
| LUMO+2 | -6.794         | 0.04        | 0.03           | 0.92 | 0.01 |
| LUMO+3 | -5.618         | 0.24        | 0.23           | 0.14 | 0.39 |
| LUMO+4 | -5.538         | 0.13        | 0.29           | 0.09 | 0.49 |
| LUMO+5 | -5.414         | 0.00        | 0.00           | 0.97 | 0.03 |
|        |                |             | $\beta$ -spin  |      |      |
| HOMO-5 | -10.190        | 0.26        | 0.23           | 0.12 | 0.39 |
| HOMO-4 | -10.146        | 0.14        | 0.20           | 0.05 | 0.62 |
| HOMO-3 | -10.097        | 0.09        | 0.28           | 0.07 | 0.57 |
| HOMO-2 | -10.02         | 0.14        | 0.38           | 0.06 | 0.42 |
| HOMO-1 | -9.908         | 0.26        | 0.07           | 0.03 | 0.63 |
| HOMO   | -9.316         | 0.13        | 0.16           | 0.59 | 0.13 |
| LUMO   | -7.885         | 0.05        | 0.19           | 0.69 | 0.07 |
| LUMO+1 | -7.602         | 0.35        | 0.35           | 0.03 | 0.28 |
| LUMO+2 | -7.419         | 0.03        | 0.58           | 0.17 | 0.21 |
| LUMO+3 | -7.212         | 0.32        | 0.34           | 0.12 | 0.22 |
| LUMO+4 | -6.779         | 0.04        | 0.05           | 0.90 | 0.02 |
| LUMO+5 | -5.515         | 0.27        | 0.13           | 0.12 | 0.49 |



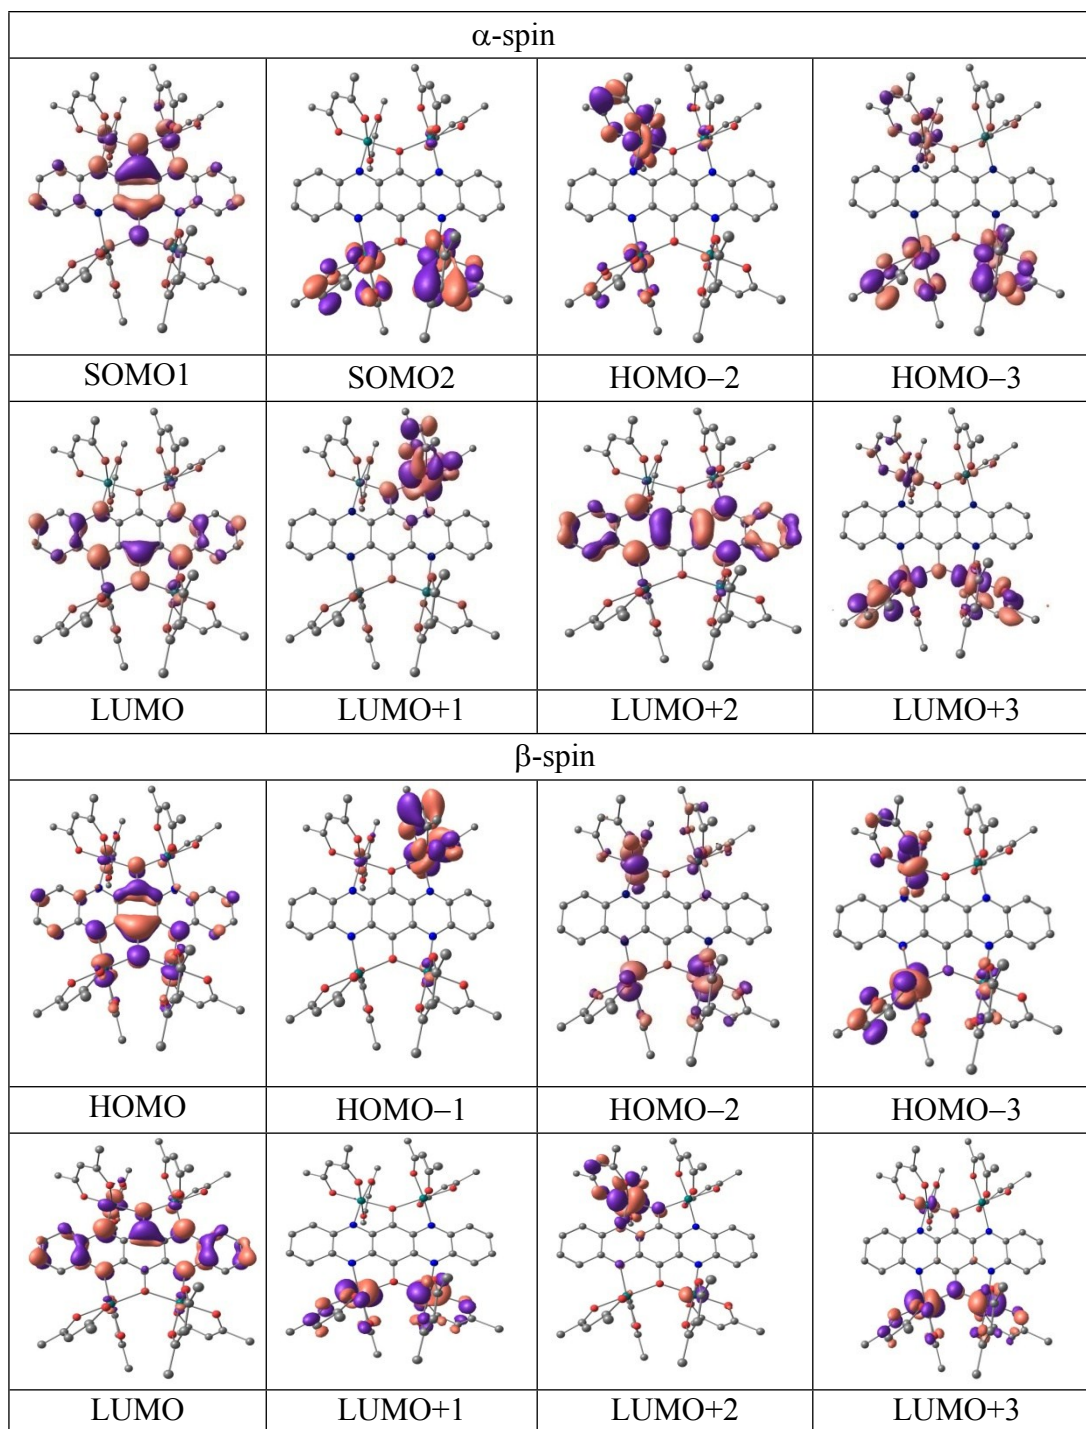

**Table S20** Composition and energy of selected molecular orbitals of  $2^-$  ( $S=1/2$ )

| MO     | Energy<br>(eV) | Composition |                |      |      |
|--------|----------------|-------------|----------------|------|------|
|        |                | Ru1         | Ru2            | L    | acac |
|        |                |             | $\alpha$ -spin |      |      |
| HOMO-5 | -2.626         | 0.36        | 0.34           | 0.05 | 0.25 |
| HOMO-4 | -2.304         | 0.19        | 0.45           | 0.03 | 0.33 |
| HOMO-3 | -2.211         | 0.19        | 0.50           | 0.04 | 0.27 |
| HOMO-2 | -2.135         | 0.46        | 0.19           | 0.08 | 0.26 |
| HOMO-1 | -2.097         | 0.49        | 0.15           | 0.05 | 0.31 |
| SOMO   | -1.635         | 0.19        | 0.19           | 0.51 | 0.11 |
| LUMO   | -0.550         | 0.10        | 0.10           | 0.75 | 0.05 |
| LUMO+1 | 0.531          | 0.04        | 0.03           | 0.90 | 0.03 |
| LUMO+2 | 1.406          | 0.05        | 0.00           | 0.03 | 0.92 |
| LUMO+3 | 1.410          | 0.05        | 0.00           | 0.03 | 0.92 |
| LUMO+4 | 1.444          | 0.00        | 0.04           | 0.03 | 0.92 |
| LUMO+5 | 1.444          | 0.00        | 0.05           | 0.03 | 0.92 |
|        |                |             | $\beta$ -spin  |      |      |
| HOMO-5 | -2.491         | 0.37        | 0.34           | 0.06 | 0.23 |
| HOMO-4 | -2.256         | 0.39        | 0.37           | 0.05 | 0.19 |
| HOMO-3 | -2.113         | 0.28        | 0.31           | 0.18 | 0.23 |
| HOMO-2 | -1.769         | 0.16        | 0.52           | 0.08 | 0.24 |
| HOMO-1 | -1.760         | 0.40        | 0.33           | 0.01 | 0.27 |
| HOMO   | -1.697         | 0.46        | 0.07           | 0.26 | 0.20 |
| LUMO   | -0.241         | 0.24        | 0.24           | 0.39 | 0.13 |
| LUMO+1 | -0.225         | 0.26        | 0.26           | 0.35 | 0.14 |
| LUMO+2 | 0.364          | 0.04        | 0.04           | 0.89 | 0.03 |
| LUMO+3 | 1.416          | 0.05        | 0.00           | 0.03 | 0.91 |
| LUMO+4 | 1.420          | 0.05        | 0.00           | 0.04 | 0.91 |
| LUMO+5 | 1.456          | 0.00        | 0.05           | 0.04 | 0.91 |

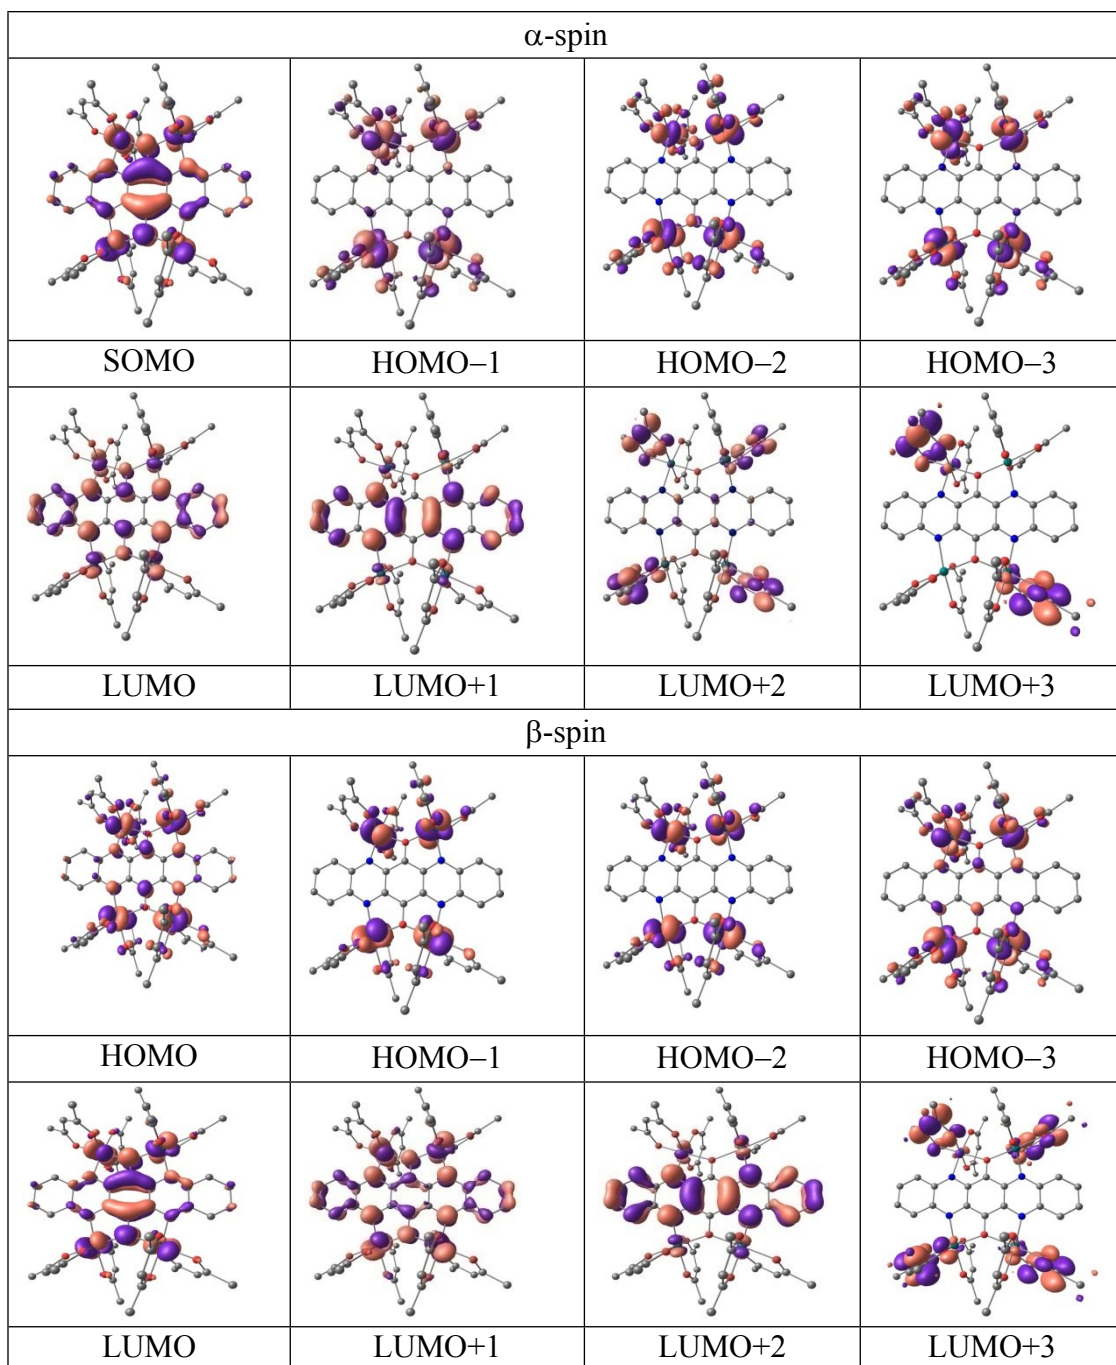

**Table S21** Composition and energy of selected molecular orbitals of  $2^{2-}$  ( $S=1$ )

| MO     | Energy<br>(eV) | Composition |                |      |      |
|--------|----------------|-------------|----------------|------|------|
|        |                | Ru1         | Ru2            | L    | acac |
|        |                |             | $\alpha$ -spin |      |      |
| HOMO-5 | -0.014         | 0.35        | 0.36           | 0.03 | 0.25 |
| HOMO-4 | 0.109          | 0.37        | 0.38           | 0.04 | 0.21 |
| HOMO-3 | 0.147          | 0.35        | 0.35           | 0.11 | 0.19 |
| HOMO-2 | 0.195          | 0.36        | 0.35           | 0.05 | 0.24 |
| SOMO2  | 0.626          | 0.21        | 0.21           | 0.48 | 0.10 |
| SOMO1  | 0.986          | 0.14        | 0.13           | 0.67 | 0.06 |
| LUMO   | 2.591          | 0.04        | 0.04           | 0.88 | 0.04 |
| LUMO+1 | 3.651          | 0.02        | 0.02           | 0.04 | 0.92 |
| LUMO+2 | 3.661          | 0.03        | 0.01           | 0.04 | 0.91 |
| LUMO+3 | 3.664          | 0.02        | 0.03           | 0.03 | 0.92 |
| LUMO+4 | 3.667          | 0.02        | 0.03           | 0.02 | 0.93 |
| LUMO+5 | 3.931          | 0.05        | 0.04           | 0.03 | 0.87 |
|        |                |             | $\beta$ -spin  |      |      |
| HOMO-5 | -0.088         | 0.23        | 0.47           | 0.10 | 0.20 |
| HOMO-4 | 0.180          | 0.38        | 0.38           | 0.03 | 0.22 |
| HOMO-3 | 0.215          | 0.39        | 0.38           | 0.01 | 0.22 |
| HOMO-2 | 0.268          | 0.36        | 0.36           | 0.09 | 0.19 |
| HOMO-1 | 0.309          | 0.39        | 0.38           | 0.06 | 0.17 |
| HOMO   | 0.466          | 0.32        | 0.34           | 0.16 | 0.18 |
| LUMO   | 2.127          | 0.17        | 0.17           | 0.58 | 0.08 |
| LUMO+1 | 2.288          | 0.15        | 0.15           | 0.62 | 0.09 |
| LUMO+2 | 3.022          | 0.04        | 0.04           | 0.84 | 0.09 |
| LUMO+3 | 3.669          | 0.02        | 0.02           | 0.04 | 0.92 |
| LUMO+4 | 3.683          | 0.03        | 0.03           | 0.05 | 0.89 |
| LUMO+5 | 3.697          | 0.03        | 0.03           | 0.03 | 0.91 |

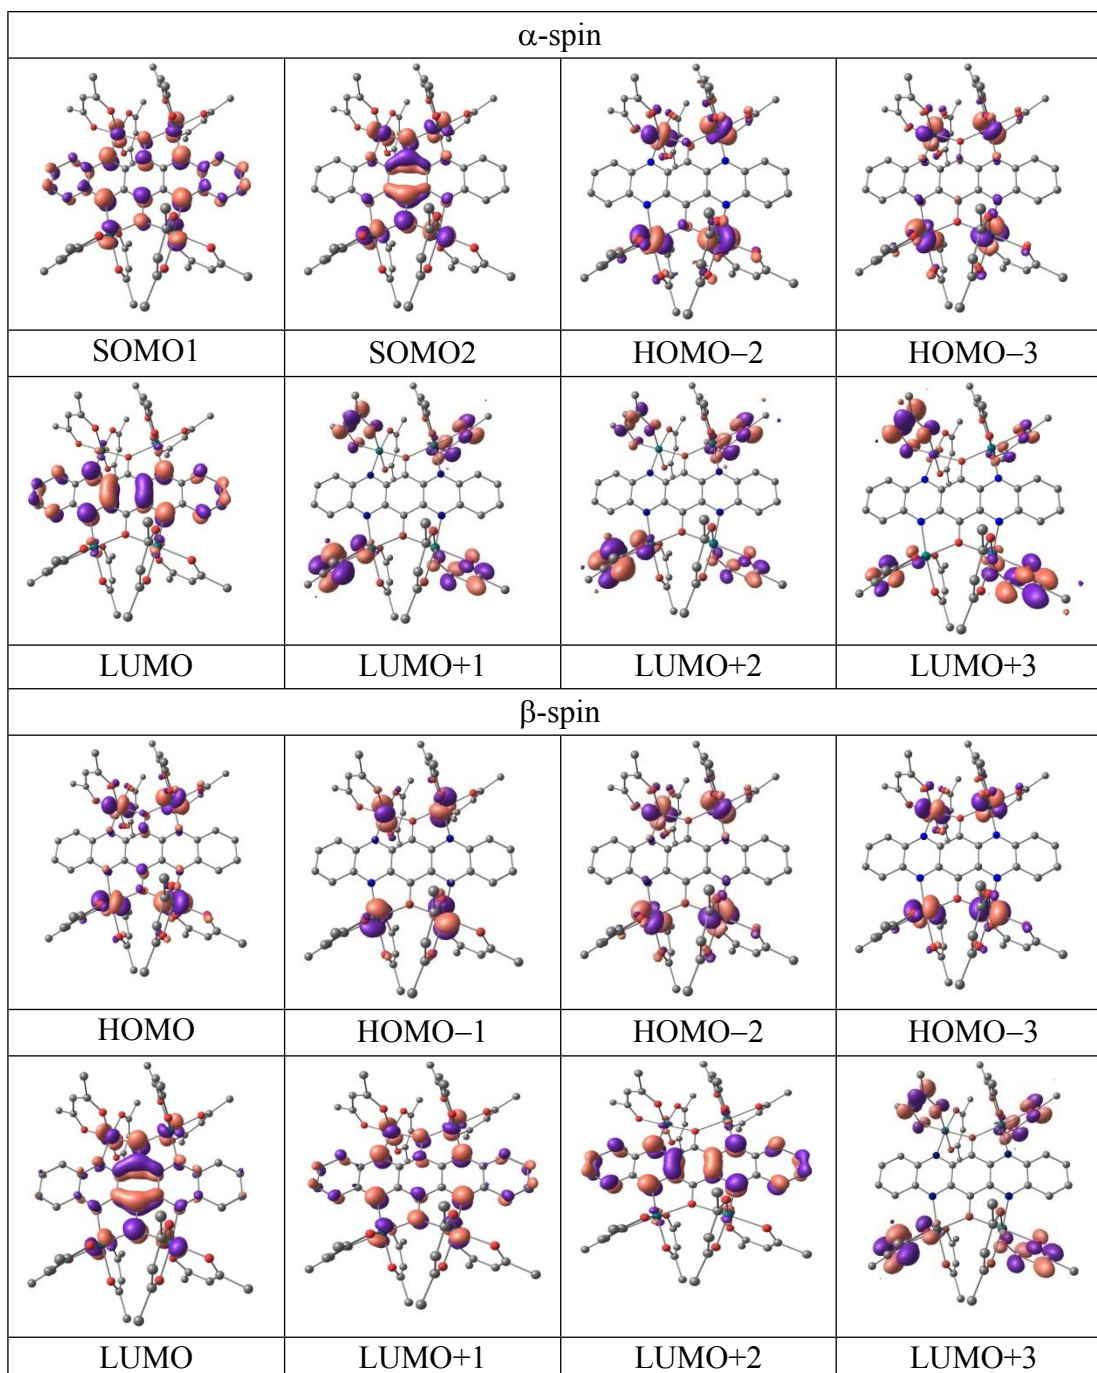

**Table S22** Composition and energy of selected molecular orbitals of  $2^{3-}$  ( $S=1/2$ )

| MO     | Energy<br>(eV) | Composition |                |      |      |
|--------|----------------|-------------|----------------|------|------|
|        |                | Ru1         | Ru2            | L    | acac |
|        |                |             | $\alpha$ -spin |      |      |
| HOMO-5 | 2.491          | 0.39        | 0.38           | 0.02 | 0.21 |
| HOMO-4 | 2.586          | 0.40        | 0.39           | 0.04 | 0.18 |
| HOMO-3 | 2.643          | 0.35        | 0.37           | 0.10 | 0.17 |
| HOMO-2 | 2.737          | 0.36        | 0.38           | 0.08 | 0.18 |
| HOMO-1 | 3.537          | 0.15        | 0.15           | 0.64 | 0.06 |
| SOMO   | 3.568          | 0.14        | 0.14           | 0.65 | 0.07 |
| LUMO   | 5.128          | 0.03        | 0.03           | 0.86 | 0.86 |
| LUMO+1 | 5.851          | 0.03        | 0.02           | 0.03 | 0.03 |
| LUMO+2 | 5.861          | 0.03        | 0.02           | 0.04 | 0.04 |
| LUMO+3 | 5.869          | 0.02        | 0.03           | 0.02 | 0.02 |
| LUMO+4 | 5.877          | 0.02        | 0.03           | 0.04 | 0.04 |
| LUMO+5 | 6.141          | 0.07        | 0.06           | 0.03 | 0.03 |
|        |                |             | $\beta$ -spin  |      |      |
| HOMO-5 | 2.500          | 0.40        | 0.39           | 0.02 | 0.19 |
| HOMO-4 | 2.525          | 0.40        | 0.39           | 0.01 | 0.20 |
| HOMO-3 | 2.668          | 0.39        | 0.39           | 0.06 | 0.16 |
| HOMO-2 | 2.715          | 0.37        | 0.38           | 0.08 | 0.17 |
| HOMO-1 | 2.791          | 0.36        | 0.37           | 0.10 | 0.17 |
| HOMO   | 3.840          | 0.14        | 0.14           | 0.66 | 0.07 |
| LUMO   | 4.591          | 0.11        | 0.11           | 0.69 | 0.08 |
| LUMO+1 | 5.503          | 0.02        | 0.02           | 0.74 | 0.21 |
| LUMO+2 | 5.862          | 0.03        | 0.02           | 0.03 | 0.92 |
| LUMO+3 | 5.874          | 0.03        | 0.03           | 0.04 | 0.90 |
| LUMO+4 | 5.891          | 0.03        | 0.04           | 0.03 | 0.91 |
| LUMO+5 | 5.920          | 0.03        | 0.04           | 0.12 | 0.81 |

| $\alpha$ -spin                                                                      |                                                                                     |                                                                                      |                                                                                       |
|-------------------------------------------------------------------------------------|-------------------------------------------------------------------------------------|--------------------------------------------------------------------------------------|---------------------------------------------------------------------------------------|
| 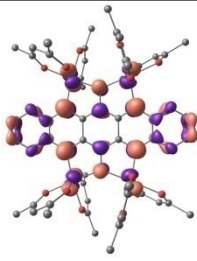   |    |    |    |
| SOMO1                                                                               | HOMO-1                                                                              | HOMO-2                                                                               | HOMO-3                                                                                |
|    |    |    |    |
| LUMO                                                                                | LUMO+1                                                                              | LUMO+2                                                                               | LUMO+3                                                                                |
| $\beta$ -spin                                                                       |                                                                                     |                                                                                      |                                                                                       |
|   |   |   |   |
| HOMO                                                                                | HOMO-1                                                                              | HOMO-2                                                                               | HOMO-3                                                                                |
|  |  |  |  |
| LUMO                                                                                | LUMO+1                                                                              | LUMO+2                                                                               | LUMO+3                                                                                |

**Table S23** Experimental and TD-DFT ((U)B3LYP/CPCM/CH<sub>3</sub>CN) calculated electronic transitions for **1<sup>n</sup>**

| $\lambda_{\max}^{a,b}$<br>(expt.) ( $\epsilon/\text{dm}^3$<br>$\text{mol}^{-1}\text{cm}^{-1}$ ) <sup>c</sup> | $\lambda^b$<br>(DFT)<br>( $f$ ) <sup>d</sup> | Transitions                                                                    | Character                                                                                                                                                                                         |
|--------------------------------------------------------------------------------------------------------------|----------------------------------------------|--------------------------------------------------------------------------------|---------------------------------------------------------------------------------------------------------------------------------------------------------------------------------------------------|
| <b>1 (S=0)</b>                                                                                               |                                              |                                                                                |                                                                                                                                                                                                   |
|                                                                                                              | 2064<br>(0.01)                               | HOMO→LUMO(0.62)                                                                | Ru2(dπ)/acac(π)/Ru3(dπ)→L(π <sup>*</sup> )/Ru1(dπ)/Ru3(dπ)                                                                                                                                        |
|                                                                                                              | 1040<br>(0.01)                               | HOMO→LUMO+1(0.57)                                                              | Ru2(dπ)/acac(π)/Ru3(dπ)→L(π <sup>*</sup> )/Ru1(dπ)                                                                                                                                                |
| 1023<br>(7320)                                                                                               | 939<br>(0.03)<br>902<br>(0.12)               | HOMO-1→LUMO+1(0.46)<br>HOMO-3→LUMO(0.53)                                       | Ru2(dπ)/acac(π)/Ru3(dπ)→L(π <sup>*</sup> )/Ru1(dπ)<br>acac(π)/Ru1(dπ)→L(π <sup>*</sup> )/Ru1(dπ)/Ru3(dπ)                                                                                          |
|                                                                                                              | 775<br>(0.11)                                | HOMO-4→LUMO(0.47)                                                              | Ru1(dπ)/Ru3(dπ)/acac(π)→L(π <sup>*</sup> )/Ru1(dπ)/Ru3(dπ)                                                                                                                                        |
| 599<br>(37800)                                                                                               | 668<br>(0.14)                                | HOMO-4→LUMO+1(0.64)                                                            | Ru1(dπ)/Ru3(dπ)/acac(π)→L(π <sup>*</sup> )/Ru1(dπ)                                                                                                                                                |
|                                                                                                              | 542<br>(0.12)                                | HOMO-11→LUMO(0.48)<br>HOMO-2→LUMO+2(0.37)                                      | acac(π)→L(π <sup>*</sup> )/Ru1(dπ)/Ru3(dπ)<br>Ru2(dπ)/acac(π)/Ru1(dπ)→L(π <sup>*</sup> )                                                                                                          |
| 325<br>(65300)                                                                                               | 348<br>(0.34)                                | HOMO-20→LUMO+1(0.51)                                                           | L(π)→L(π <sup>*</sup> )/Ru1(dπ)                                                                                                                                                                   |
| <b>1 (S=1)</b>                                                                                               |                                              |                                                                                |                                                                                                                                                                                                   |
|                                                                                                              | 2933<br>(0.01)                               | HOMO(β)→LUMO+2(β) (0.50)<br>HOMO-4(β)→LUMO+2(β) (0.33)                         | L(π)/Ru2(dπ)/Ru1(dπ)→L(π <sup>*</sup> )/Ru3(dπ)/Ru2(dπ)<br>acac(π)/Ru2(dπ)/Ru1(dπ)→L(π <sup>*</sup> )/Ru3(dπ)/Ru2(dπ)                                                                             |
|                                                                                                              | 1463<br>(0.05)                               | HOMO-2(β)→LUMO(β) (0.46)<br>HOMO-1(β)→LUMO+1(β) (0.29)                         | Ru2(dπ)/L(π)/acac(π)→Ru3(dπ)/Ru2(dπ)/acac(π <sup>*</sup> )<br>Ru1(dπ) acac(π)→Ru1(dπ)/L(π <sup>*</sup> )                                                                                          |
|                                                                                                              | 1232<br>(0.02)                               | HOMO(β)→LUMO(β) (0.47)<br>HOMO-2(β)→LUMO(β) (0.45)<br>HOMO(β)→LUMO+1(β) (0.42) | L(π)/Ru2(dπ)/Ru1(dπ)→Ru3(dπ)/Ru2(dπ)/acac(π <sup>*</sup> )<br>Ru2(dπ)/L(π)/acac(π)→Ru3(dπ)/Ru2(dπ)/acac(π <sup>*</sup> )<br>L(π)/Ru2(dπ)/Ru1(dπ)→Ru1(dπ)/L(π <sup>*</sup> )/acac(π <sup>*</sup> ) |
|                                                                                                              | 1184<br>(0.06)                               | HOMO-1(β)→LUMO(β) (0.50)<br>HOMO-6(β)→LUMO(β) (0.42)                           | Ru1(dπ)/acac(π)→Ru3(dπ)/Ru2(dπ)/acac(π <sup>*</sup> )<br>Ru3(dπ)/acac(π)→Ru3(dπ)/Ru2(dπ)/acac(π <sup>*</sup> )                                                                                    |
| 1023<br>(7320)                                                                                               | 1077<br>(0.01)                               | HOMO-1(β)→LUMO+2(β) (0.58)<br>HOMO-4(β)→LUMO+2(β) (0.32)                       | Ru1(dπ)/acac(π)→L(π <sup>*</sup> )/Ru3(dπ)/Ru2(dπ)<br>acac(π)/Ru2(dπ)/Ru1(dπ)→L(π <sup>*</sup> )/Ru3(dπ)/Ru2(dπ)                                                                                  |
|                                                                                                              | 986<br>(0.03)                                | HOMO(β)→LUMO+1(β) (0.66)                                                       | L(π)/Ru2(dπ)/Ru1(dπ)→Ru1(dπ)/L(π <sup>*</sup> )/acac(π <sup>*</sup> )                                                                                                                             |
|                                                                                                              | 859<br>(0.02)                                | SOMO2(α)→LUMO(α) (0.86)                                                        | Ru1(dπ)/acac(π)→L(π <sup>*</sup> )                                                                                                                                                                |
|                                                                                                              | 774<br>(0.06)                                | SOMO1(α)→LUMO+2(α) (0.71)                                                      | L(π)→L(π <sup>*</sup> )                                                                                                                                                                           |



|                              |                 |                                                                                                                                                                                     |                                                                                                                                                                                                                                                |
|------------------------------|-----------------|-------------------------------------------------------------------------------------------------------------------------------------------------------------------------------------|------------------------------------------------------------------------------------------------------------------------------------------------------------------------------------------------------------------------------------------------|
| 599<br>(37800)               | 580<br>(0.10)   | HOMO-4( $\alpha$ ) $\rightarrow$ LUMO( $\alpha$ ) (0.70)<br>HOMO-7( $\alpha$ ) $\rightarrow$ LUMO+2( $\alpha$ ) (0.41)                                                              | acac( $\pi$ )/Ru1(d $\pi$ ) $\rightarrow$ L( $\pi^*$ )<br>acac( $\pi$ )/Ru3(d $\pi$ ) $\rightarrow$ L( $\pi^*$ )                                                                                                                               |
| 325<br>(65300)               | 371<br>(0.04)   | HOMO-15( $\beta$ ) $\rightarrow$ LUMO+1( $\beta$ ) (0.41)<br>HOMO-13( $\beta$ ) $\rightarrow$ LUMO+2( $\beta$ ) (0.34)<br>HOMO-14( $\beta$ ) $\rightarrow$ LUMO+2( $\beta$ ) (0.34) | acac( $\pi$ ) $\rightarrow$ Ru1(d $\pi$ )/L( $\pi^*$ )/acac( $\pi^*$ )<br>L( $\pi$ )/acac( $\pi$ ) $\rightarrow$ L( $\pi^*$ )/Ru3(d $\pi$ )/Ru2(d $\pi$ )<br>L( $\pi$ )/acac( $\pi$ ) $\rightarrow$ Ru1(d $\pi$ )/L( $\pi^*$ )/acac( $\pi^*$ ) |
| <b>1<sup>+</sup> (S=1/2)</b> |                 |                                                                                                                                                                                     |                                                                                                                                                                                                                                                |
|                              | 2304<br>(0.01)  | HOMO( $\beta$ ) $\rightarrow$ LUMO+3( $\beta$ )(0.53)                                                                                                                               | Ru1(d $\pi$ )/acac( $\pi$ )/L( $\pi$ ) $\rightarrow$ L( $\pi^*$ )/Ru1(d $\pi$ )                                                                                                                                                                |
|                              | 1303<br>(0.06)  | SOMO( $\alpha$ ) $\rightarrow$ LUMO( $\alpha$ )(0.74)                                                                                                                               | L( $\pi$ )/acac( $\pi$ ) $\rightarrow$ Ru3(d $\pi$ )/L( $\pi^*$ )                                                                                                                                                                              |
|                              | 1122<br>(0.05)  | HOMO( $\beta$ ) $\rightarrow$ LUMO+1( $\beta$ )(0.54)                                                                                                                               | Ru1(d $\pi$ )/acac( $\pi$ )/L( $\pi$ ) $\rightarrow$ L( $\pi^*$ )/Ru2(d $\pi$ )                                                                                                                                                                |
|                              | 1051<br>(0.03)  | SOMO1( $\alpha$ ) $\rightarrow$ LUMO+1( $\alpha$ )(0.53)                                                                                                                            | L( $\pi$ )/acac( $\pi$ ) $\rightarrow$ L( $\pi^*$ )                                                                                                                                                                                            |
| 700sh                        | 646<br>(0.03)   | SOMO1( $\alpha$ ) $\rightarrow$ LUMO+2( $\alpha$ )(0.62)                                                                                                                            | L( $\pi$ )/acac( $\pi$ ) $\rightarrow$ L( $\pi^*$ )                                                                                                                                                                                            |
|                              | 620<br>(0.03)   | HOMO-2( $\alpha$ ) $\rightarrow$ LUMO+1( $\alpha$ )(0.78)                                                                                                                           | acac( $\pi$ )/Ru1(d $\pi$ ) $\rightarrow$ L( $\pi^*$ )                                                                                                                                                                                         |
| 572<br>(31250)               | 567<br>(0.09)   | HOMO-5( $\alpha$ ) $\rightarrow$ LUMO( $\alpha$ )(0.52)                                                                                                                             | Ru3(d $\pi$ )/acac( $\pi$ ) $\rightarrow$ Ru3(d $\pi$ )/L( $\pi^*$ )                                                                                                                                                                           |
|                              | 421<br>(0.04)   | HOMO-1( $\alpha$ ) $\rightarrow$ LUMO+2( $\alpha$ )(0.39)<br>HOMO-12( $\alpha$ ) $\rightarrow$ LUMO( $\alpha$ )(0.30)                                                               | acac( $\pi$ )/Ru1(d $\pi$ ) $\rightarrow$ L( $\pi^*$ )<br>acac( $\pi$ ) $\rightarrow$ Ru3(d $\pi$ )/L( $\pi^*$ )                                                                                                                               |
|                              | 381<br>(0.04)   | HOMO-5( $\beta$ ) $\rightarrow$ LUMO+3( $\beta$ )(0.42)<br>HOMO-17( $\beta$ ) $\rightarrow$ LUMO( $\beta$ )(0.25)                                                                   | acac( $\pi$ )/Ru3(d $\pi$ ) $\rightarrow$ L( $\pi^*$ )<br>L( $\pi$ )/acac( $\pi$ ) $\rightarrow$ Ru2(d $\pi$ )/L( $\pi^*$ )                                                                                                                    |
| 329<br>(62600)               | 369<br>(0.02)   | HOMO-15( $\alpha$ ) $\rightarrow$ LUMO+1( $\alpha$ )(0.50)<br>HOMO-18( $\beta$ ) $\rightarrow$ LUMO+2( $\beta$ )(0.20)                                                              | Ru2(d $\pi$ )/acac( $\pi$ )/L( $\pi$ ) $\rightarrow$ L( $\pi^*$ )<br>acac( $\pi$ )/L( $\pi$ ) $\rightarrow$ L( $\pi^*$ )/Ru1(d $\pi$ )                                                                                                         |
| <b>1<sup>2+</sup> (S=1)</b>  |                 |                                                                                                                                                                                     |                                                                                                                                                                                                                                                |
|                              | 2902<br>(0.003) | HOMO( $\beta$ ) $\rightarrow$ LUMO+2( $\beta$ )(0.51)                                                                                                                               | acac( $\pi$ )/Ru3(d $\pi$ )/L( $\pi$ ) $\rightarrow$ Ru2(d $\pi$ )/acac( $\pi^*$ )                                                                                                                                                             |
|                              | 2491<br>(0.003) | HOMO( $\beta$ ) $\rightarrow$ LUMO+2( $\beta$ )(0.55)                                                                                                                               | acac( $\pi$ )/Ru3(d $\pi$ )/L( $\pi$ ) $\rightarrow$ Ru1(d $\pi$ )/acac( $\pi^*$ )                                                                                                                                                             |
|                              | 1794<br>(0.005) | HOMO( $\beta$ ) $\rightarrow$ LUMO+1( $\beta$ )(0.36)<br>HOMO-( $\beta$ ) $\rightarrow$ LUMO+1( $\beta$ )(0.24)                                                                     | acac( $\pi$ )/Ru3(d $\pi$ )/L( $\pi$ ) $\rightarrow$ L( $\pi^*$ )<br>acac( $\pi$ )/Ru1(d $\pi$ ) $\rightarrow$ L( $\pi^*$ )                                                                                                                    |
|                              | 1494<br>(0.03)  | HOMO( $\beta$ ) $\rightarrow$ LUMO( $\beta$ )(0.90)                                                                                                                                 | acac( $\pi$ )/Ru3(d $\pi$ )/L( $\pi$ ) $\rightarrow$ L( $\pi^*$ )/Ru3(d $\pi$ )/acac( $\pi^*$ )                                                                                                                                                |
|                              | 961<br>(0.01)   | HOMO( $\beta$ ) $\rightarrow$ LUMO+1( $\beta$ )(0.78)                                                                                                                               | acac( $\pi$ )/Ru3(d $\pi$ )/L( $\pi$ ) $\rightarrow$ L( $\pi^*$ )                                                                                                                                                                              |
|                              | 866<br>(0.02)   | HOMO( $\beta$ ) $\rightarrow$ LUMO+3( $\beta$ )(0.59)                                                                                                                               | acac( $\pi$ )/Ru3(d $\pi$ )/L( $\pi$ ) $\rightarrow$ Ru1(d $\pi$ )/acac( $\pi^*$ )                                                                                                                                                             |
| 654<br>(21870)               | 695<br>(0.11)   | HOMO-3( $\alpha$ ) $\rightarrow$ LUMO( $\alpha$ )(0.30)<br>HOMO( $\beta$ ) $\rightarrow$ LUMO+4( $\beta$ )(0.34)                                                                    | acac( $\pi$ ) $\rightarrow$ L( $\pi^*$ )/Ru3(d $\pi$ )<br>acac( $\pi$ )/Ru3(d $\pi$ )/L( $\pi$ ) $\rightarrow$ L( $\pi^*$ )                                                                                                                    |
|                              | 618<br>(0.07)   | HOMO-6( $\beta$ ) $\rightarrow$ LUMO( $\beta$ )(0.39)                                                                                                                               | acac( $\pi$ )/Ru1(d $\pi$ ) $\rightarrow$ L( $\pi^*$ )/Ru3(d $\pi$ )/acac( $\pi^*$ )                                                                                                                                                           |

|                              |                 |                                                                                                                      |                                                                                                                                                                                         |
|------------------------------|-----------------|----------------------------------------------------------------------------------------------------------------------|-----------------------------------------------------------------------------------------------------------------------------------------------------------------------------------------|
| 584sh                        | 587<br>(0.04)   | HOMO-9( $\alpha$ ) $\rightarrow$ LUMO( $\alpha$ )(0.39)<br>HOMO-11( $\beta$ ) $\rightarrow$ LUMO+1( $\beta$ )(0.26)  | Ru1(d $\pi$ )/acac( $\pi$ ) $\rightarrow$ L( $\pi^*$ )/Ru3(d $\pi$ )<br>acac( $\pi$ )/Ru3(d $\pi$ )/L( $\pi$ ) $\rightarrow$ L( $\pi^*$ )                                               |
|                              | 509<br>(0.02)   | HOMO-5( $\alpha$ ) $\rightarrow$ LUMO+1( $\alpha$ )(0.47)                                                            | Ru3(d $\pi$ )/acac( $\pi$ ) $\rightarrow$ L( $\pi^*$ )                                                                                                                                  |
| 358<br>(48500)               | 374<br>(0.01)   | HOMO-13( $\beta$ ) $\rightarrow$ LUMO+3( $\beta$ )(0.32)<br>HOMO-14( $\beta$ ) $\rightarrow$ LUMO+2( $\beta$ )(0.21) | acac( $\pi$ )/Ru3(d $\pi$ )/L( $\pi$ ) $\rightarrow$ Ru3(d $\pi$ )/acac( $\pi^*$ )<br>acac( $\pi$ )/L( $\pi$ ) $\rightarrow$ Ru2(d $\pi$ )/acac( $\pi^*$ )                              |
| <b>1<sup>-</sup> (S=1/2)</b> |                 |                                                                                                                      |                                                                                                                                                                                         |
|                              | 3198<br>(0.01)  | SOMO( $\alpha$ ) $\rightarrow$ LUMO( $\alpha$ )(0.90)                                                                | L( $\pi$ ) $\rightarrow$ L( $\pi^*$ )                                                                                                                                                   |
|                              | 2007<br>(0.01)  | HOMO ( $\beta$ ) $\rightarrow$ LUMO+1( $\beta$ )(0.69)                                                               | Ru3(d $\pi$ )/acac( $\pi$ ) $\rightarrow$ L( $\pi^*$ )/Ru2(d $\pi$ )/ Ru3(d $\pi$ )                                                                                                     |
| 1800<br>(2500)               | 1638<br>(0.02)  | HOMO-2( $\beta$ ) $\rightarrow$ LUMO+1( $\beta$ )(0.64)<br>HOMO-1( $\beta$ ) $\rightarrow$ LUMO+1( $\beta$ )(0.58)   | Ru2(d $\pi$ )/Ru3(d $\pi$ )/acac( $\pi$ ) $\rightarrow$ L( $\pi^*$ )/Ru2(d $\pi$ )/Ru3(d $\pi$ )<br>Ru2(d $\pi$ )/acac( $\pi$ ) $\rightarrow$ L( $\pi^*$ )/Ru2(d $\pi$ )/ Ru3(d $\pi$ ) |
|                              | 1433<br>(0.03)  | HOMO-2( $\beta$ ) $\rightarrow$ LUMO+1( $\beta$ )(0.51)                                                              | Ru2(d $\pi$ )/Ru3(d $\pi$ )/acac( $\pi$ ) $\rightarrow$ L( $\pi^*$ )/Ru2(d $\pi$ )/Ru3(d $\pi$ )                                                                                        |
|                              | 1142<br>(0.012) | HOMO( $\beta$ ) $\rightarrow$ LUMO( $\beta$ )(0.63)                                                                  | Ru3(d $\pi$ )/acac( $\pi$ ) $\rightarrow$ L( $\pi^*$ )                                                                                                                                  |
|                              | 915<br>(0.11)   | HOMO-5( $\beta$ ) $\rightarrow$ LUMO+1( $\beta$ )(0.48)<br>HOMO-9( $\alpha$ ) $\rightarrow$ LUMO( $\alpha$ )(0.37)   | Ru2(d $\pi$ )/Ru3(d $\pi$ )/acac( $\pi$ ) $\rightarrow$ L( $\pi^*$ )/Ru2(d $\pi$ )/Ru3(d $\pi$ )<br>Ru1(d $\pi$ )/acac( $\pi$ ) $\rightarrow$ L( $\pi^*$ )                              |
| 691<br>(29050)               | 666<br>(0.12)   | HOMO-9( $\alpha$ ) $\rightarrow$ LUMO( $\alpha$ )(0.73)                                                              | Ru1(d $\pi$ )/acac( $\pi$ ) $\rightarrow$ L( $\pi^*$ )                                                                                                                                  |
| 561<br>(15320)               | 574<br>(0.11)   | HOMO-2( $\alpha$ ) $\rightarrow$ LUMO+1( $\alpha$ )(0.67)                                                            | Ru2(d $\pi$ )/Ru3(d $\pi$ )/acac( $\pi$ ) $\rightarrow$ L( $\pi^*$ )                                                                                                                    |
|                              | 463<br>(0.05)   | HOMO-14( $\beta$ ) $\rightarrow$ LUMO( $\beta$ )(0.36)<br>HOMO-8( $\beta$ ) $\rightarrow$ LUMO+2( $\beta$ )(0.30)    | acac( $\pi$ ) $\rightarrow$ L( $\pi^*$ )<br>Ru1(d $\pi$ )/acac( $\pi$ ) $\rightarrow$ L( $\pi^*$ )                                                                                      |
|                              | 403<br>(0.04)   | HOMO-21( $\alpha$ ) $\rightarrow$ LUMO( $\alpha$ )(0.31)<br>HOMO-1( $\beta$ ) $\rightarrow$ LUMO+7( $\beta$ )(0.26)  | L( $\pi$ )/acac( $\pi$ ) $\rightarrow$ L( $\pi^*$ )<br>Ru2(d $\pi$ )/acac( $\pi$ ) $\rightarrow$ L( $\pi^*$ )                                                                           |
| 370sh                        | 389<br>(0.03)   | HOMO-15( $\beta$ ) $\rightarrow$ LUMO( $\beta$ )(0.52)                                                               | L( $\pi$ ) $\rightarrow$ L( $\pi^*$ )                                                                                                                                                   |
| <b>1<sup>2-</sup> (S=1)</b>  |                 |                                                                                                                      |                                                                                                                                                                                         |
|                              | 1590<br>(0.01)  | HOMO( $\beta$ ) $\rightarrow$ LUMO( $\beta$ )(0.85)                                                                  | Ru1(d $\pi$ )/Ru2(d $\pi$ )/acac( $\pi$ ) $\rightarrow$ L( $\pi^*$ )                                                                                                                    |
|                              | 1269<br>(0.02)  | SOMO1( $\alpha$ ) $\rightarrow$ LUMO( $\alpha$ )(0.70)                                                               | L( $\pi$ ) $\rightarrow$ L( $\pi^*$ )                                                                                                                                                   |
|                              | 1089<br>(0.04)  | SOMO2( $\alpha$ ) $\rightarrow$ LUMO( $\alpha$ )(0.70)                                                               | L( $\pi$ ) $\rightarrow$ L( $\pi^*$ )                                                                                                                                                   |
| 976sh                        | 979<br>(0.10)   | SOMO2( $\alpha$ ) $\rightarrow$ LUMO( $\alpha$ )(0.66)                                                               | L( $\pi$ ) $\rightarrow$ L( $\pi^*$ )                                                                                                                                                   |
| 811<br>(20400)               | 905<br>(0.24)   | HOMO( $\beta$ ) $\rightarrow$ LUMO+1( $\beta$ )(0.36)<br>HOMO( $\beta$ ) $\rightarrow$ LUMO( $\beta$ )(0.36)         | Ru1(d $\pi$ )/Ru2(d $\pi$ )/acac( $\pi$ ) $\rightarrow$ L( $\pi^*$ )<br>Ru1(d $\pi$ )/Ru2(d $\pi$ )/acac( $\pi$ ) $\rightarrow$ L( $\pi^*$ )                                            |
|                              | 836<br>(0.02)   | HOMO-5( $\beta$ ) $\rightarrow$ LUMO( $\beta$ )(0.53)<br>HOMO-4( $\beta$ ) $\rightarrow$ LUMO+2( $\beta$ )(0.46)     | Ru3(d $\pi$ )/acac( $\pi$ )/Ru1(d $\pi$ ) $\rightarrow$ L( $\pi^*$ )<br>Ru1(d $\pi$ ) $\rightarrow$ L( $\pi^*$ )                                                                        |

|                |                |                                                                                                                                                                                 |                                                                                                                                                          |
|----------------|----------------|---------------------------------------------------------------------------------------------------------------------------------------------------------------------------------|----------------------------------------------------------------------------------------------------------------------------------------------------------|
| 710<br>(20250) | 647<br>(0.04)  | HOMO-3( $\alpha$ ) $\rightarrow$ LUMO( $\alpha$ )(0.74)                                                                                                                         | Ru2(d $\pi$ )/Ru3(d $\pi$ )/acac( $\pi$ ) $\rightarrow$ L( $\pi^*$ )                                                                                     |
|                | 589<br>(0.10)  | HOMO( $\beta$ ) $\rightarrow$ LUMO+2( $\beta$ )(0.87)                                                                                                                           | Ru1(d $\pi$ )/Ru2(d $\pi$ )/acac( $\pi$ ) $\rightarrow$ L( $\pi^*$ )                                                                                     |
|                | 520<br>(0.04)  | SOMO1( $\alpha$ ) $\rightarrow$ LUMO+7( $\alpha$ )(0.40)<br>HOMO-3( $\beta$ ) $\rightarrow$ LUMO+2( $\beta$ )(0.34)                                                             | L( $\pi$ ) $\rightarrow$ L( $\pi^*$ )<br>Ru3(d $\pi$ )/acac( $\pi$ ) $\rightarrow$ L( $\pi^*$ )                                                          |
| 450sh          | 421<br>(0.12)  | SOMO2( $\alpha$ ) $\rightarrow$ LUMO+7( $\alpha$ )(0.56)                                                                                                                        | L( $\pi$ ) $\rightarrow$ L( $\pi^*$ )                                                                                                                    |
|                | 382<br>(0.05)  | HOMO-5( $\alpha$ ) $\rightarrow$ LUMO+3( $\alpha$ )(0.53)                                                                                                                       | Ru1(d $\pi$ ) $\rightarrow$ acac( $\pi^*$ )                                                                                                              |
| 338<br>(46400) | 361<br>(0.013) | HOMO-12( $\alpha$ ) $\rightarrow$ LUMO( $\alpha$ )(0.32)<br>SOMO1( $\alpha$ ) $\rightarrow$ LUMO+12( $\alpha$ )(0.21)<br>HOMO-18( $\beta$ ) $\rightarrow$ LUMO( $\beta$ )(0.19) | acac( $\pi$ ) $\rightarrow$ L( $\pi^*$ )<br>L( $\pi$ ) $\rightarrow$ L( $\pi^*$ )/acac( $\pi^*$ )/Ru1(d $\pi$ )<br>L( $\pi$ ) $\rightarrow$ L( $\pi^*$ ) |

<sup>a</sup>From OTTLE spectroelectrochemistry in CH<sub>3</sub>CN/0.1 M Bu<sub>4</sub>NPF<sub>6</sub>. <sup>b</sup>In nm. <sup>c</sup>Molar extinction

coefficients in dm<sup>3</sup> mol<sup>-1</sup> cm<sup>-1</sup>. <sup>d</sup>Calculated oscillator strengths.

**Table S24** Experimental and TD-DFT ((U)B3LYP/CPCM/CH<sub>3</sub>CN) calculated electronic transitions for **2<sup>n</sup>**

| $\lambda_{\max}^{a,b}$<br>(expt.) ( $\epsilon/\text{dm}^3$<br>$\text{mol}^{-1}\text{cm}^{-1}$ ) <sup>c</sup> | $\lambda^b$<br>(DFT)<br>( <i>f</i> ) <sup>d</sup> | Transitions                                                    | Character                                                                                                                                              |
|--------------------------------------------------------------------------------------------------------------|---------------------------------------------------|----------------------------------------------------------------|--------------------------------------------------------------------------------------------------------------------------------------------------------|
| <b>2 (S=0)</b>                                                                                               |                                                   |                                                                |                                                                                                                                                        |
|                                                                                                              | 1032<br>(0.01)                                    | HOMO-3→LUMO+1(0.60)                                            | Ru2(dπ)/acac(π)→L(π <sup>*</sup> )/Ru1(dπ)/Ru2(dπ)                                                                                                     |
| 1290(sh)                                                                                                     | 1020<br>(0.10)                                    | HOMO-1→LUMO+1(0.58)                                            | Ru1(dπ)/acac(π)/Ru2(dπ)→L(π <sup>*</sup> )/Ru2(dπ)/Ru1(dπ)                                                                                             |
|                                                                                                              | 983<br>(0.11)<br>816<br>(0.11)                    | HOMO-4→LUMO(0.55)<br>HOMO-10→LUMO(0.63)                        | Ru1(dπ)/Ru2(dπ)/acac(π)→L(π <sup>*</sup> )/Ru1(dπ)/Ru2(dπ)<br>Ru1(dπ)/Ru2(dπ)/acac(π)→L(π <sup>*</sup> )/Ru1(dπ)/Ru2(dπ)                               |
| 673<br>(39850)                                                                                               | 688<br>(0.13)<br>671<br>(0.11)<br>617<br>(0.15)   | HOMO-9→LUMO+1(0.64)<br>HOMO→LUMO+2(0.45)<br>HOMO-12→LUMO(0.57) | Ru2(dπ)/acac(π)/Ru1(dπ)→L(π <sup>*</sup> )/Ru2(dπ)/Ru1(dπ)<br>Ru1(dπ)/acac(π)/Ru2(dπ)→L(π <sup>*</sup> )<br>acac(π)→L(π <sup>*</sup> )/Ru2(dπ)/Ru1(dπ) |
| 345<br>(65440)                                                                                               | 348<br>(0.52)                                     | HOMO-26→LUMO+1(0.54)<br>HOMO-1→LUMO+3(0.36)                    | L(π)→L(π <sup>*</sup> )/Ru2(dπ)/ Ru1(dπ)<br>Ru1(dπ)/acac(π)/Ru2(dπ)→acac(π <sup>*</sup> )                                                              |
| <b>2 (S=1)</b>                                                                                               |                                                   |                                                                |                                                                                                                                                        |
|                                                                                                              | 3525<br>(0.006)                                   | HOMO(β)→LUMO(β) (0.60)                                         | Ru2(dπ)/L(π)/acac(π)→Ru1(dπ)/acac(π <sup>*</sup> )                                                                                                     |
|                                                                                                              | 3277<br>(0.007)                                   | HOMO(β)→LUMO+1(β) (0.50)<br>HOMO-1(β)→LUMO+1(β) (0.41)         | Ru2(dπ)/L(π)/acac(π)→Ru1(dπ)/L(π <sup>*</sup> )<br>L(π)/Ru2(dπ)/ acac(π)→Ru1(dπ)/acac(π <sup>*</sup> )                                                 |
|                                                                                                              | 1659<br>(0.03)                                    | HOMO(β)→LUMO(β) (0.58)                                         | Ru2(dπ)/L(π)/acac(π)→Ru1(dπ)/acac(π <sup>*</sup> )                                                                                                     |
| 1290(sh)                                                                                                     | 1220<br>(0.03)                                    | HOMO-3(β)→LUMO(β) (0.47)<br>HOMO(β)→LUMO(β) (0.41)             | Ru2(dπ)/ acac(π)→Ru1(dπ)/acac(π <sup>*</sup> )<br>Ru2(dπ)/L(π)/acac(π)→Ru1(dπ)/acac(π <sup>*</sup> )                                                   |
|                                                                                                              | 1075<br>(0.03)                                    | HOMO(β)→LUMO+2(β) (0.43)<br>HOMO-1(β)→LUMO+2(β) (0.41)         | Ru2(dπ)/L(π)/acac(π)→L(π <sup>*</sup> )/Ru2(dπ)/ Ru1(dπ)<br>L(π)/Ru2(dπ)/acac(π)→L(π <sup>*</sup> )/Ru2(dπ)/ Ru1(dπ)                                   |
|                                                                                                              | 949<br>(0.03)                                     | HOMO-2(α)→LUMO(α) (0.64)<br>HOMO-3(α)→LUMO+2(α) (0.43)         | Ru2(dπ)/acac(π)/L(π)→L(π <sup>*</sup> )Ru2(dπ)/acac(π <sup>*</sup> )<br>Ru2(dπ)/acac(π)→L(π <sup>*</sup> )Ru2(dπ)/acac(π <sup>*</sup> )                |
|                                                                                                              | 816<br>(0.05)                                     | SOMO1(α)→LUMO+1(α) (0.75)                                      | L(π)/Ru2(dπ)/acac(π)→L(π <sup>*</sup> )                                                                                                                |
|                                                                                                              | 716<br>(0.06)                                     | HOMO-6(β)→LUMO(β) (0.54)<br>HOMO(β)→LUMO+3(β) (0.48)           | Ru2(dπ)/acac(π)→Ru1(dπ)/acac(π <sup>*</sup> )<br>Ru2(dπ)/L(π)/acac(π)→L(π <sup>*</sup> )                                                               |
| 673<br>(39850)                                                                                               | 604<br>(0.02)                                     | HOMO-5(β)→LUMO+2(β) (0.45)<br>HOMO-8(β)→LUMO(β) (0.36)         | Ru1(dπ)/acac(π)→L(π <sup>*</sup> )/Ru2(dπ)/ Ru1(dπ)<br>Ru2(dπ)/ Ru1(dπ) acac(π)→Ru1(dπ)/acac(π <sup>*</sup> )                                          |

|                    |                                 |                                                                                                                        |                                                                                                                                                         |
|--------------------|---------------------------------|------------------------------------------------------------------------------------------------------------------------|---------------------------------------------------------------------------------------------------------------------------------------------------------|
| 345<br>(65440)     | 454<br>(0.04)                   | HOMO-6( $\beta$ ) $\rightarrow$ LUMO+3( $\beta$ ) (0.63)                                                               | Ru2(d $\pi$ )/acac( $\pi$ ) $\rightarrow$ L( $\pi^*$ )                                                                                                  |
| $2^+$ ( $S=1/2$ )  |                                 |                                                                                                                        |                                                                                                                                                         |
|                    | 3348<br>(0.02)                  | HOMO-1( $\beta$ ) $\rightarrow$ LUMO( $\beta$ )(0.52)                                                                  | Ru2(d $\pi$ )/acac( $\pi$ ) $\rightarrow$ L( $\pi^*$ )/Ru1(d $\pi$ )                                                                                    |
|                    | 2016<br>(0.01)                  | SOMO( $\alpha$ ) $\rightarrow$ LUMO( $\alpha$ )(0.53)<br>HOMO-2( $\beta$ ) $\rightarrow$ LUMO+2( $\beta$ )(0.51)       | L( $\pi$ )/Ru2(d $\pi$ ) $\rightarrow$ Ru2(d $\pi$ )/L( $\pi^*$ )<br>Ru2(d $\pi$ )/acac( $\pi$ ) $\rightarrow$ Ru1(d $\pi$ )/ acac( $\pi^*$ )           |
| 1700<br>(br, 3230) | 1703<br>(0.002)                 | HOMO-1( $\beta$ ) $\rightarrow$ LUMO+2( $\beta$ )(0.48)                                                                | Ru2(d $\pi$ )/acac( $\pi$ ) $\rightarrow$ Ru1(d $\pi$ )/ acac( $\pi^*$ )                                                                                |
|                    | 1409<br>(0.02)                  | HOMO-2( $\alpha$ ) $\rightarrow$ LUMO( $\alpha$ )(0.54)                                                                | Ru2(d $\pi$ )/acac( $\pi$ ) $\rightarrow$ Ru2(d $\pi$ )/L( $\pi^*$ )                                                                                    |
|                    | 1161<br>(0.07)                  | HOMO-2( $\alpha$ ) $\rightarrow$ LUMO( $\alpha$ )(0.64)                                                                | Ru2(d $\pi$ )/acac( $\pi$ ) $\rightarrow$ Ru2(d $\pi$ )/L( $\pi^*$ )                                                                                    |
|                    | 1066<br>(0.05)                  | SOMO( $\alpha$ ) $\rightarrow$ LUMO+1( $\alpha$ )(0.66)                                                                | L( $\pi$ )/Ru2(d $\pi$ ) $\rightarrow$ Ru2(d $\pi$ )/L( $\pi^*$ )                                                                                       |
| 800(sh)            | 744<br>(0.09)                   | HOMO-3( $\alpha$ ) $\rightarrow$ LUMO( $\alpha$ )(0.49)<br>HOMO-2( $\alpha$ ) $\rightarrow$ LUMO+1( $\alpha$ )(0.44)   | Ru2(d $\pi$ )/L( $\pi$ ) $\rightarrow$ Ru2(d $\pi$ )/L( $\pi^*$ )<br>Ru2(d $\pi$ )/acac( $\pi$ ) $\rightarrow$ Ru2(d $\pi$ )/L( $\pi^*$ )               |
|                    | 712<br>(0.02)                   | HOMO-2( $\beta$ ) $\rightarrow$ LUMO+1( $\beta$ )(0.76)                                                                | Ru2(d $\pi$ )/acac( $\pi$ ) $\rightarrow$ L( $\pi^*$ )/Ru1(d $\pi$ )                                                                                    |
| 617<br>(32610)     | 692<br>(0.08)                   | HOMO-5( $\beta$ ) $\rightarrow$ LUMO+2( $\beta$ )(0.42)<br>HOMO-5( $\alpha$ ) $\rightarrow$ LUMO( $\alpha$ )(0.40)     | acac( $\pi$ ) $\rightarrow$ Ru1(d $\pi$ )/acac( $\pi^*$ )<br>Ru2(d $\pi$ )/acac( $\pi$ ) $\rightarrow$ Ru2(d $\pi$ )/L( $\pi^*$ )                       |
|                    | 513<br>(0.05)                   | HOMO-2( $\beta$ ) $\rightarrow$ LUMO+3( $\beta$ )(0.46)<br>HOMO-12( $\alpha$ ) $\rightarrow$ LUMO+1( $\alpha$ )(0.32)  | Ru2(d $\pi$ )/acac( $\pi$ ) $\rightarrow$ L( $\pi^*$ )<br>Ru1(d $\pi$ )/acac( $\pi$ ) $\rightarrow$ Ru2(d $\pi$ )/L( $\pi^*$ )                          |
| 331<br>(59630)     | 416<br>(0.01)                   | HOMO-7( $\beta$ ) $\rightarrow$ LUMO+3( $\beta$ )(0.61)                                                                | acac( $\pi$ ) $\rightarrow$ L( $\pi^*$ )                                                                                                                |
| $2^+$ ( $S=1$ )    |                                 |                                                                                                                        |                                                                                                                                                         |
| 1186<br>(8870)     | 1301<br>(0.11)<br>950<br>(0.02) | HOMO( $\beta$ ) $\rightarrow$ LUMO( $\beta$ )(0.69)<br>SOMO1( $\alpha$ ) $\rightarrow$ LUMO+1( $\alpha$ )(0.70)        | L( $\pi$ )/Ru1(d $\pi$ )/Ru2(d $\pi$ ) $\rightarrow$ L( $\pi^*$ )/Ru2(d $\pi$ )<br>L( $\pi$ )/Ru1(d $\pi$ ) $\rightarrow$ Ru1(d $\pi$ )/acac( $\pi^*$ ) |
| 608<br>(22810)     | 709<br>(0.04)                   | HOMO-2( $\beta$ ) $\rightarrow$ LUMO( $\beta$ )(0.61)<br>HOMO-3( $\beta$ ) $\rightarrow$ LUMO( $\beta$ )(0.52)         | acac( $\pi$ )/Ru1(d $\pi$ )/Ru2(d $\pi$ ) $\rightarrow$ L( $\pi^*$ )<br>acac( $\pi$ )/Ru2(d $\pi$ ) $\rightarrow$ L( $\pi^*$ )                          |
|                    | 650<br>(0.02)                   | HOMO-6( $\beta$ ) $\rightarrow$ LUMO ( $\beta$ )(0.48)<br>HOMO-4( $\alpha$ ) $\rightarrow$ LUMO( $\alpha$ )(0.45)      | acac( $\pi$ )/Ru2(d $\pi$ )/Ru1(d $\pi$ ) $\rightarrow$ L( $\pi^*$ )<br>Ru1(d $\pi$ )/acac( $\pi$ ) $\rightarrow$ L( $\pi^*$ )                          |
|                    | 616<br>(0.03)                   | HOMO-5( $\alpha$ ) $\rightarrow$ LUMO( $\alpha$ )(0.52)                                                                | acac( $\pi$ )/Ru2(d $\pi$ )/Ru1(d $\pi$ ) $\rightarrow$ L( $\pi^*$ )                                                                                    |
|                    | 602<br>(0.06)                   | HOMO-7( $\beta$ ) $\rightarrow$ LUMO( $\beta$ )(0.52)                                                                  | Ru1(d $\pi$ )/acac( $\pi$ )/Ru2(d $\pi$ ) $\rightarrow$ L( $\pi^*$ )                                                                                    |
| 454<br>(19340)     | 435<br>(0.04)                   | HOMO-2( $\beta$ ) $\rightarrow$ LUMO+4( $\beta$ )(0.60)                                                                | acac( $\pi$ )/Ru2(d $\pi$ )/Ru1(d $\pi$ ) $\rightarrow$ L( $\pi^*$ )                                                                                    |
|                    | 431<br>(0.02)                   | HOMO-3( $\alpha$ ) $\rightarrow$ LUMO+2( $\alpha$ )(0.35)<br>HOMO-4( $\alpha$ ) $\rightarrow$ LUMO+2( $\alpha$ )(0.57) | acac( $\pi$ )/Ru1(d $\pi$ )/Ru2(d $\pi$ ) $\rightarrow$ L( $\pi^*$ )<br>Ru1(d $\pi$ )/acac( $\pi$ ) $\rightarrow$ L( $\pi^*$ )                          |

|                    |                                                 |                                                                                                                                                                             |                                                                                                                                                                                                                                                                           |
|--------------------|-------------------------------------------------|-----------------------------------------------------------------------------------------------------------------------------------------------------------------------------|---------------------------------------------------------------------------------------------------------------------------------------------------------------------------------------------------------------------------------------------------------------------------|
| 350<br>(69490)     | 410<br>(0.02)                                   | HOMO-4( $\beta$ ) $\rightarrow$ LUMO+4( $\beta$ )(0.50)                                                                                                                     | acac( $\pi$ )/Ru2(d $\pi$ ) $\rightarrow$ L( $\pi^*$ )                                                                                                                                                                                                                    |
| $2^-$ ( $S=1/2$ )  |                                                 |                                                                                                                                                                             |                                                                                                                                                                                                                                                                           |
|                    | 3298<br>(0.03)                                  | SOMO $\rightarrow$ LUMO( $\alpha$ )(0.98)                                                                                                                                   | L( $\pi$ )/Ru1(d $\pi$ )/Ru2(d $\pi$ ) $\rightarrow$ L( $\pi^*$ )/Ru2(d $\pi$ )/ Ru1(d $\pi$ )                                                                                                                                                                            |
| 1900<br>(br, 3960) | 1823<br>(0.04)                                  | HOMO-2( $\beta$ ) $\rightarrow$ LUMO+1( $\beta$ )(0.62)<br>HOMO-1( $\beta$ ) $\rightarrow$ LUMO( $\beta$ )(0.57)                                                            | Ru2(d $\pi$ )/acac( $\pi$ )/Ru1(d $\pi$ ) $\rightarrow$ L( $\pi^*$ )<br>Ru1(d $\pi$ )/Ru2(d $\pi$ ) acac( $\pi$ ) $\rightarrow$ L( $\pi^*$ )/Ru2(d $\pi$ )/Ru1(d $\pi$ )                                                                                                  |
| 940(sh)            | 1043<br>(0.13)                                  | HOMO-3( $\beta$ ) $\rightarrow$ LUMO+1( $\beta$ )(0.49)<br>HOMO-11( $\beta$ ) $\rightarrow$ LUMO( $\beta$ )(0.40)                                                           | Ru2(d $\pi$ )/Ru1(d $\pi$ )/acac( $\pi$ ) $\rightarrow$ L( $\pi^*$ )/Ru2(d $\pi$ )/Ru1(d $\pi$ )<br>Ru2(d $\pi$ )/ Ru1(d $\pi$ )/L( $\pi$ ) $\rightarrow$ L( $\pi^*$ )/Ru2(d $\pi$ )/ Ru1(d $\pi$ )                                                                       |
| 743<br>(46500)     | 752<br>(0.07)<br>708<br>(0.08)<br>704<br>(0.06) | HOMO( $\beta$ ) $\rightarrow$ LUMO+2( $\beta$ )(0.90)<br>HOMO-1( $\beta$ ) $\rightarrow$ LUMO+2( $\beta$ )(0.51)<br>HOMO-5( $\beta$ ) $\rightarrow$ LUMO+1( $\beta$ )(0.61) | Ru1(d $\pi$ )/acac( $\pi$ )/L( $\pi$ ) $\rightarrow$ L( $\pi^*$ )<br>Ru2(d $\pi$ )/Ru1(d $\pi$ )/acac( $\pi$ ) $\rightarrow$ L( $\pi^*$ )/Ru2(d $\pi$ )/Ru1(d $\pi$ )<br>Ru2(d $\pi$ )/Ru1(d $\pi$ )/acac( $\pi$ ) $\rightarrow$ L( $\pi^*$ )/Ru2(d $\pi$ )/Ru1(d $\pi$ ) |
| 420(sh)            | 585<br>(0.19)                                   | HOMO-3( $\alpha$ ) $\rightarrow$ LUMO+1( $\alpha$ )(0.68)                                                                                                                   | Ru2(d $\pi$ )/acac( $\pi$ )/Ru1(d $\pi$ ) $\rightarrow$ L( $\pi^*$ )                                                                                                                                                                                                      |
|                    | 520<br>(0.09)                                   | HOMO-16( $\alpha$ ) $\rightarrow$ LUMO( $\alpha$ )(0.49)                                                                                                                    | acac( $\pi$ ) $\rightarrow$ L( $\pi^*$ )                                                                                                                                                                                                                                  |
|                    |                                                 | HOMO-5( $\alpha$ ) $\rightarrow$ LUMO+1( $\alpha$ )(0.68)                                                                                                                   | Ru1(d $\pi$ )/Ru2(d $\pi$ )/acac( $\pi$ ) $\rightarrow$ L( $\pi^*$ )                                                                                                                                                                                                      |
| 370(sh)            | 440<br>(0.10)                                   | HOMO-11( $\alpha$ ) $\rightarrow$ LUMO+1( $\alpha$ )(0.62)<br>SOMO( $\alpha$ ) $\rightarrow$ LUMO+2( $\alpha$ )(0.57)                                                       | Ru1(d $\pi$ )/Ru2(d $\pi$ )/acac( $\pi$ ) $\rightarrow$ L( $\pi^*$ )<br>L( $\pi$ )/Ru1(d $\pi$ )/Ru2(d $\pi$ ) $\rightarrow$ acac( $\pi^*$ )                                                                                                                              |
| 321<br>(61420)     | 401<br>(0.04)                                   | SOMO( $\alpha$ ) $\rightarrow$ LUMO+10( $\alpha$ )(0.64)                                                                                                                    | L( $\pi$ )/Ru1(d $\pi$ )/Ru2(d $\pi$ ) $\rightarrow$ acac( $\pi^*$ )                                                                                                                                                                                                      |
| $2^{2-}$ ( $S=1$ ) |                                                 |                                                                                                                                                                             |                                                                                                                                                                                                                                                                           |
|                    | 1772<br>(0.02)                                  | HOMO( $\beta$ ) $\rightarrow$ LUMO( $\beta$ )(0.80)                                                                                                                         | Ru2(d $\pi$ )/Ru1(d $\pi$ )/acac( $\pi$ ) $\rightarrow$ L( $\pi^*$ )/Ru2(d $\pi$ )/Ru1(d $\pi$ )                                                                                                                                                                          |
| 1196<br>(10870)    | 1066<br>(0.22)                                  | SOMO1( $\alpha$ ) $\rightarrow$ LUMO( $\alpha$ )(0.62)<br>HOMO-1( $\beta$ ) $\rightarrow$ LUMO( $\beta$ )(0.57)                                                             | L( $\pi$ ) $\rightarrow$ L( $\pi^*$ )<br>Ru2(d $\pi$ )/Ru1(d $\pi$ )/acac( $\pi$ ) $\rightarrow$ L( $\pi^*$ )/Ru2(d $\pi$ )/Ru1(d $\pi$ )                                                                                                                                 |
|                    | 951<br>(0.15)                                   | HOMO-2( $\beta$ ) $\rightarrow$ LUMO+1( $\beta$ )(0.68)<br>HOMO( $\beta$ ) $\rightarrow$ LUMO( $\beta$ )(0.57)                                                              | Ru2(d $\pi$ )/Ru1(d $\pi$ )/acac( $\pi$ ) $\rightarrow$ L( $\pi^*$ )/Ru2(d $\pi$ )/Ru1(d $\pi$ )<br>Ru2(d $\pi$ )/Ru1(d $\pi$ )/acac( $\pi$ ) $\rightarrow$ L( $\pi^*$ )/Ru2(d $\pi$ )/Ru1(d $\pi$ )                                                                      |
| 760<br>(49580)     | 827<br>(0.06)                                   | HOMO-6( $\beta$ ) $\rightarrow$ LUMO+1( $\beta$ )(0.57)                                                                                                                     | Ru1(d $\pi$ )/L( $\pi$ )/acac( $\pi$ ) $\rightarrow$ L( $\pi^*$ )/Ru2(d $\pi$ )/Ru1(d $\pi$ )                                                                                                                                                                             |
|                    | 678<br>(0.08)                                   | HOMO-4( $\alpha$ ) $\rightarrow$ LUMO( $\alpha$ )(0.66)                                                                                                                     | Ru2(d $\pi$ )/Ru1(d $\pi$ )/acac( $\pi$ ) $\rightarrow$ L( $\pi^*$ )                                                                                                                                                                                                      |
|                    | 635<br>(0.09)                                   | HOMO( $\beta$ ) $\rightarrow$ LUMO+2( $\beta$ )(0.65)                                                                                                                       | Ru2(d $\pi$ )/Ru1(d $\pi$ )/acac( $\pi$ ) $\rightarrow$ L( $\pi^*$ )                                                                                                                                                                                                      |
| 435<br>(36180)     | 552<br>(0.24)                                   | HOMO-8( $\alpha$ ) $\rightarrow$ LUMO( $\alpha$ )(0.71)                                                                                                                     | Ru1(d $\pi$ )/Ru2(d $\pi$ )/acac( $\pi$ ) $\rightarrow$ L( $\pi^*$ )                                                                                                                                                                                                      |
|                    | 425<br>(0.03)                                   | HOMO-18( $\beta$ ) $\rightarrow$ LUMO ( $\beta$ )(0.51)                                                                                                                     | L( $\pi$ )/acac( $\pi$ ) $\rightarrow$ L( $\pi^*$ )/Ru2(d $\pi$ )/Ru1(d $\pi$ )                                                                                                                                                                                           |
|                    | 420<br>(0.09)                                   | SOMO2( $\alpha$ ) $\rightarrow$ LUMO+5( $\alpha$ )(0.51)                                                                                                                    | L( $\pi$ )/Ru2(d $\pi$ )/Ru1(d $\pi$ ) $\rightarrow$ acac( $\pi^*$ )                                                                                                                                                                                                      |

|                 |                 |                                                                                                                      |                                                                                                                                              |
|-----------------|-----------------|----------------------------------------------------------------------------------------------------------------------|----------------------------------------------------------------------------------------------------------------------------------------------|
| 327<br>(56650)  | 413<br>(0.01)   | HOMO-1( $\beta$ ) $\rightarrow$ LUMO+8( $\beta$ ) (0.52)                                                             | Ru1(d $\pi$ )/Ru2(d $\pi$ )/acac( $\pi$ ) $\rightarrow$ acac( $\pi^*$ )                                                                      |
| $2^3- (S=1/2)$  |                 |                                                                                                                      |                                                                                                                                              |
|                 | 4433<br>(0.04)  | HOMO( $\beta$ ) $\rightarrow$ LUMO( $\beta$ )(0.99)                                                                  | L( $\pi$ )/Ru2(d $\pi$ )/Ru1(d $\pi$ ) $\rightarrow$ L( $\pi^*$ )                                                                            |
| 1754<br>(10860) | 1490<br>(0.003) | HOMO-1( $\alpha$ ) $\rightarrow$ LUMO( $\alpha$ )(0.78)                                                              | L( $\pi$ )/Ru2(d $\pi$ )/Ru1(d $\pi$ ) $\rightarrow$ L( $\pi^*$ )                                                                            |
| 1386<br>(7240)  | 1345<br>(0.12)  | SOMO( $\alpha$ ) $\rightarrow$ LUMO( $\alpha$ )(0.97)                                                                | L( $\pi$ )/Ru2(d $\pi$ )/Ru1(d $\pi$ ) $\rightarrow$ acac( $\pi^*$ )                                                                         |
|                 | 1240<br>(0.04)  | HOMO-2( $\beta$ ) $\rightarrow$ LUMO( $\beta$ )(0.96)                                                                | Ru2(d $\pi$ )/Ru1(d $\pi$ )/acac( $\pi$ ) $\rightarrow$ L( $\pi^*$ )                                                                         |
| 998<br>(13960)  | 1038<br>(0.10)  | HOMO-4( $\beta$ ) $\rightarrow$ LUMO( $\beta$ )(0.95)                                                                | Ru1(d $\pi$ )/Ru2(d $\pi$ )/acac( $\pi$ ) $\rightarrow$ L( $\pi^*$ )                                                                         |
| 771<br>(34810)  | 784<br>(0.04)   | HOMO-11( $\beta$ ) $\rightarrow$ LUMO( $\beta$ )(0.91)                                                               | Ru1(d $\pi$ )/Ru2(d $\pi$ )/acac( $\pi$ ) $\rightarrow$ L( $\pi^*$ )                                                                         |
| 583(sh)         | 589<br>(0.02)   | HOMO-10( $\alpha$ ) $\rightarrow$ LUMO( $\alpha$ )(0.83)                                                             | Ru1(d $\pi$ )/Ru2(d $\pi$ )/acac( $\pi$ ) $\rightarrow$ L( $\pi^*$ )                                                                         |
|                 | 579<br>(0.21)   | HOMO-3( $\beta$ ) $\rightarrow$ LUMO+1( $\beta$ )(0.61)                                                              | Ru1(d $\pi$ )/Ru2(d $\pi$ )/acac( $\pi$ ) $\rightarrow$ L( $\pi^*$ )                                                                         |
| 500(sh)         | 484<br>(0.02)   | HOMO-1( $\alpha$ ) $\rightarrow$ LUMO+9( $\alpha$ )(0.57)                                                            | L( $\pi$ )/Ru2(d $\pi$ )/Ru1(d $\pi$ ) $\rightarrow$ L( $\pi^*$ )                                                                            |
| 445<br>(44220)  | 434<br>(0.11)   | HOMO-12( $\beta$ ) $\rightarrow$ LUMO+1( $\beta$ )(0.40)                                                             | Ru1(d $\pi$ )/Ru2(d $\pi$ )/L( $\pi$ ) $\rightarrow$ L( $\pi^*$ )                                                                            |
|                 | 433<br>(0.11)   | HOMO-12 ( $\beta$ ) $\rightarrow$ LUMO+1( $\beta$ )(0.38)<br>HOMO-3( $\beta$ ) $\rightarrow$ LUMO+2( $\beta$ )(0.32) | Ru1(d $\pi$ )/Ru2(d $\pi$ )/L( $\pi$ ) $\rightarrow$ L( $\pi^*$ )<br>Ru2(d $\pi$ )/Ru1(d $\pi$ )/acac( $\pi$ ) $\rightarrow$ acac( $\pi^*$ ) |

<sup>a</sup>From OTTLE spectroelectrochemistry in CH<sub>3</sub>CN/0.1 M Bu<sub>4</sub>NPF<sub>6</sub>. <sup>b</sup>In nm. <sup>c</sup>Molar extinction

coefficients in dm<sup>3</sup> mol<sup>-1</sup> cm<sup>-1</sup>. <sup>d</sup>Calculated oscillator strengths.

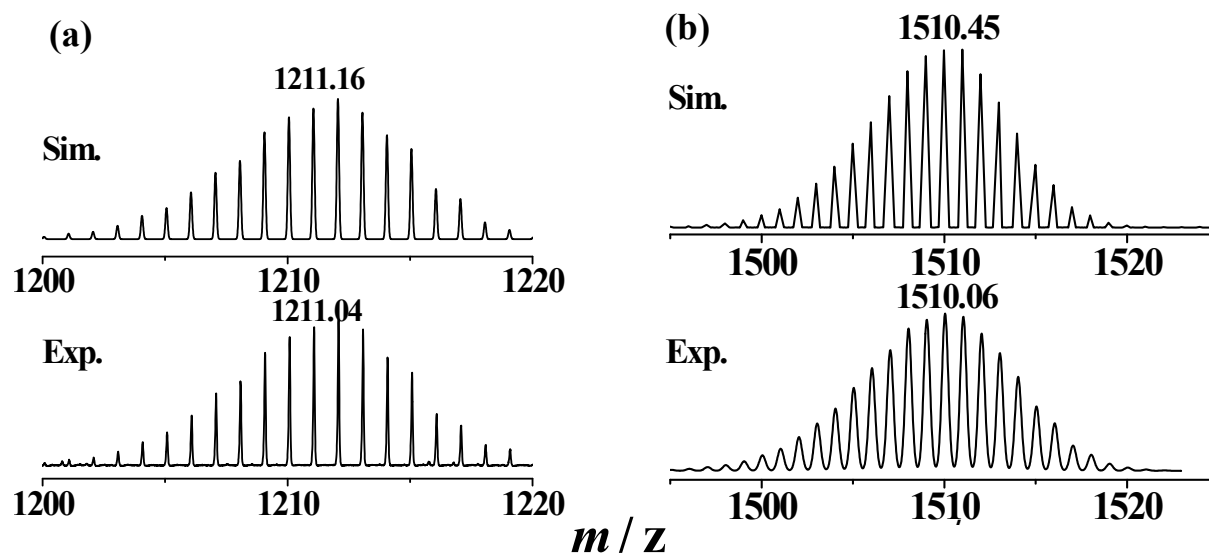

**Fig. S1** Experimental and simulated ESI-MS(+) spectra of (a)  $1^+$  and (b)  $2^+$  in  $\text{CH}_3\text{CN}$ .



(a)

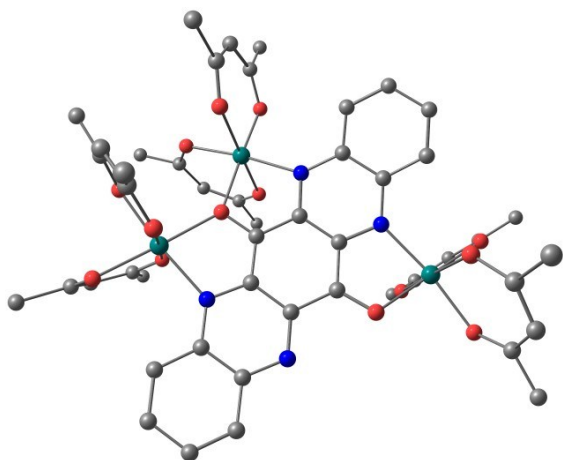

(b)

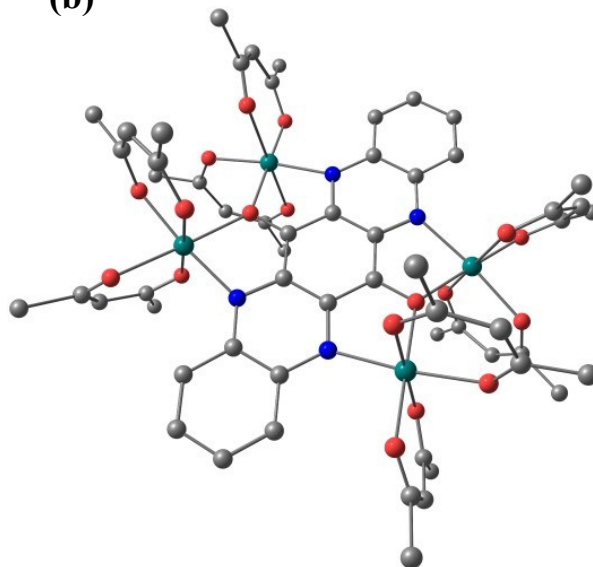

**Fig. S2** DFT (B3LYP/LanL2DZ/6-31G\*) optimised structures of (a) **1** ( $S=0$ ) and (b) **2** ( $S=0$ ).

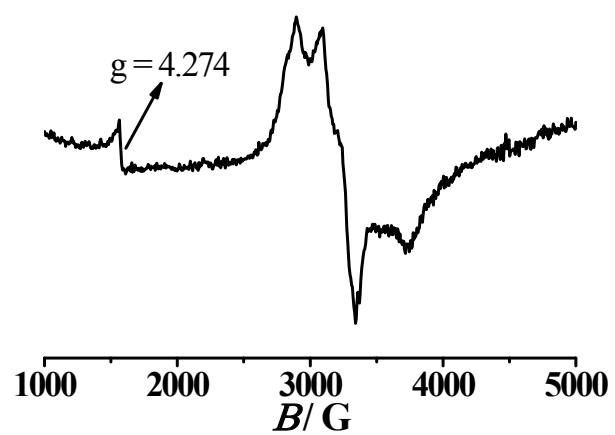

**Fig. S3** EPR spectrum of partially oxidised **1** in  $\text{CH}_3\text{CN}/\text{Bu}_4\text{NPF}_6$  at 4 K with half-field signal.

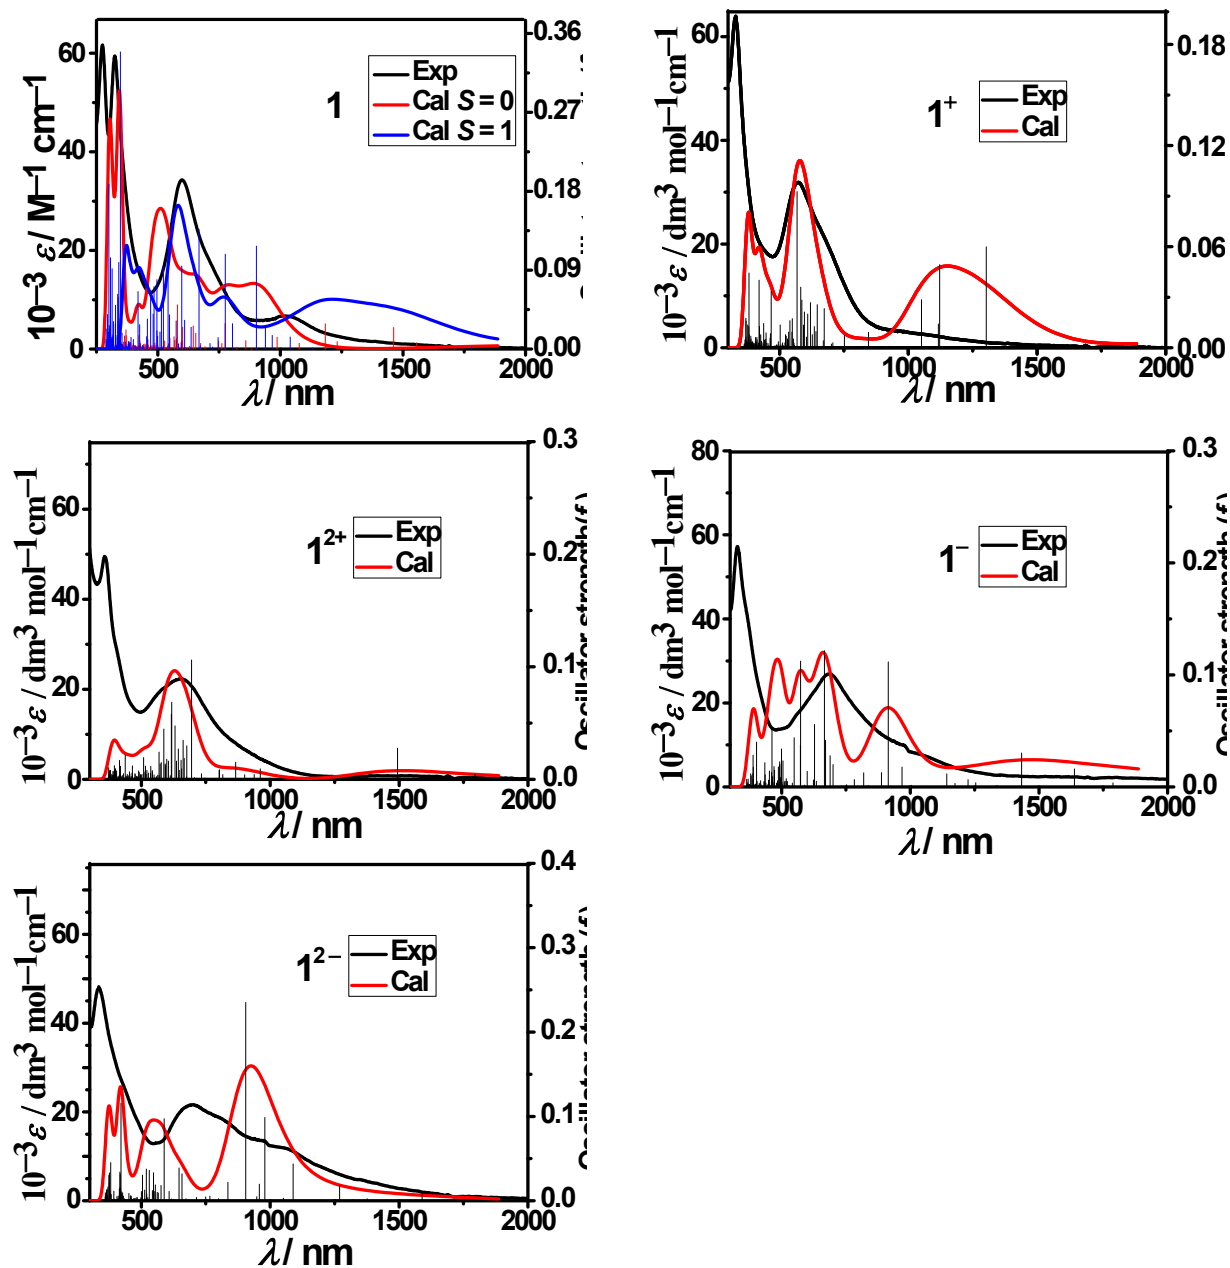

**Fig. S4** Experimental (UV-vis-NIR/ $\text{CH}_3\text{CN}$ ) and TD-DFT ((U)B3LYP/CPCM/ $\text{CH}_3\text{CN}$ ) calculated spectra of  $1^n$ . Oscillator strengths are shown by the black vertical lines; the spectra (red) are convoluted with a Gaussian function having full width at half-maximum of  $2000 \text{ cm}^{-1}$ .

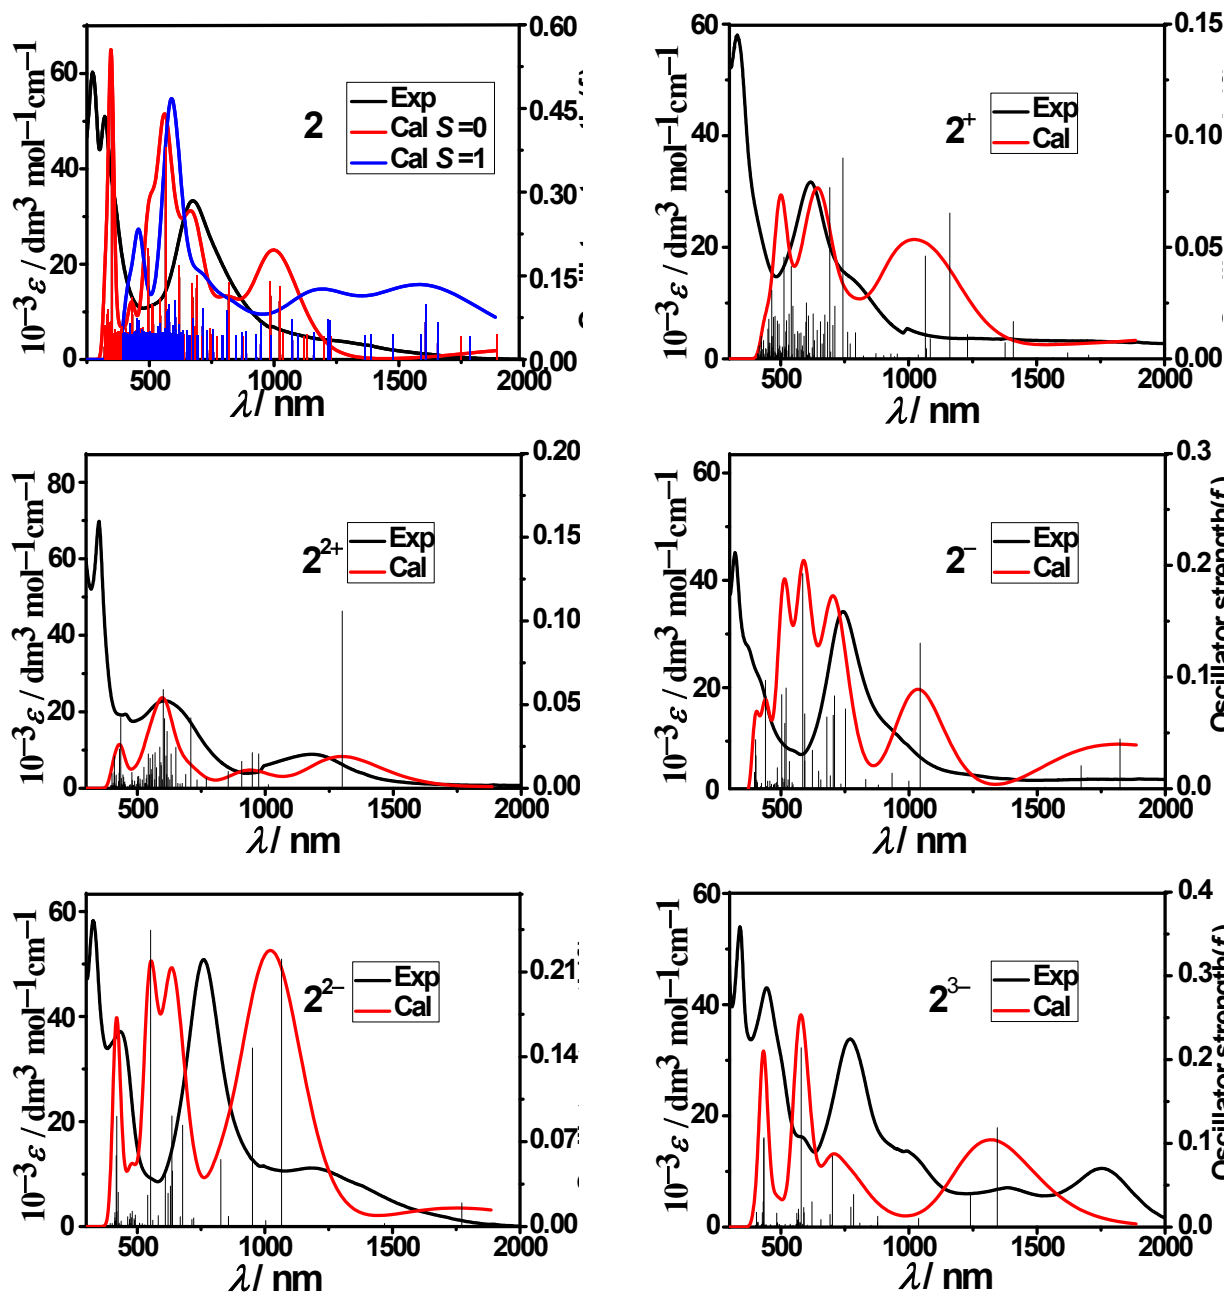

**Fig. S5** Experimental (UV-vis-NIR/ $\text{CH}_3\text{CN}$ ) and TD-DFT ((U)B3LYP/CPCM/ $\text{CH}_3\text{CN}$ ) calculated spectra of  $2^n$ . Oscillator strengths are shown by the black vertical lines; the spectra (red) are convoluted with a Gaussian function having full width at half-maximum of  $2000 \text{ cm}^{-1}$ .
